1 **Elevated temperature inhibits SARS-CoV-2 replication in**  
2 **respiratory epithelium independently of the induction of IFN-**  
3 **mediated innate immune defences**

4 Vanessa Herder<sup>1a</sup>, Kieran Dee<sup>1a</sup>, Joanna K. Wojtus<sup>1</sup>, Daniel Goldfarb<sup>1</sup>, Christoforos Rozario<sup>1</sup>,  
5 Quan Gu<sup>1</sup>, Ruth F. Jarrett<sup>1</sup>, Ilaria Epifano<sup>1</sup>, Andrew Stevenson<sup>1</sup>, Steven McFarlane<sup>1</sup>,  
6 Meredith E. Stewart<sup>1</sup>, Agnieszka M. Szemiel<sup>1</sup>, Rute M. Pinto<sup>1</sup>, Andreu Masdefiol Garriga<sup>1/2</sup>,  
7 Sheila V. Graham<sup>1b</sup>, Pablo R. Murcia<sup>1b</sup>, Chris Boutell<sup>1b</sup>.

8

9 <sup>1</sup> MRC-University of Glasgow Centre for Virus Research (CVR), 464 Bearsden Road,  
10 Glasgow, G61 1QH, Scotland (UK)

11 <sup>2</sup> University of Glasgow School of Veterinary Medicine, 464 Bearsden Road, Glasgow, G61  
12 1QH, Scotland (UK)

13 <sup>a</sup> Authors contributed equally to this work

14 <sup>b</sup> Co-corresponding authors

15

16 Corresponding author:

17 Chris Boutell; Email: [chris.boutell@glasgow.ac.uk](mailto:chris.boutell@glasgow.ac.uk)

18

19 **Running title:** Elevated temperature restricts SARS-CoV-2 replication

20

21 **Keywords:** Respiratory epithelium, SARS-CoV-2, primary human bronchiolar epithelial  
22 cells, COVID-19, temperature, immune regulation, RNA-Seq

## 23 **Abstract**

24 The pandemic spread of SARS-CoV-2, the etiological agent of COVID-19, represents a  
25 significant and ongoing international health crisis. A key symptom of SARS-CoV-2 infection  
26 is the onset of fever, with a hyperthermic temperature range of 38 to 41°C. Fever is an  
27 evolutionarily conserved host response to microbial infection and inflammation that can  
28 influence the outcome of viral pathogenicity and regulation of host innate and adaptive  
29 immune responses. However, it remains to be determined what effect elevated temperature  
30 has on SARS-CoV-2 tropism and replication. Utilizing a 3D air-liquid interface (ALI) model  
31 that closely mimics the natural tissue physiology and cellular tropism of SARS-CoV-2  
32 infection in the respiratory airway, we identify tissue temperature to play an important role in  
33 the regulation of SARS-CoV-2 infection. We show that temperature elevation induces wide-  
34 spread transcriptome changes that impact upon the regulation of multiple pathways, including  
35 epigenetic regulation and lncRNA expression, without disruption of general cellular  
36 transcription or the induction of interferon (IFN)-mediated antiviral immune defences.  
37 Respiratory tissue incubated at temperatures  $>37^{\circ}\text{C}$  remained permissive to SARS-CoV-2  
38 infection but severely restricted the initiation of viral transcription, leading to significantly  
39 reduced levels of intraepithelial viral RNA accumulation and apical shedding of infectious  
40 virus. To our knowledge, we present the first evidence that febrile temperatures associated  
41 with COVID-19 inhibit SARS-CoV-2 replication. Our data identify an important role for  
42 temperature elevation in the epithelial restriction of SARS-CoV-2 that occurs independently  
43 of the induction of canonical IFN-mediated antiviral immune defences and interferon-  
44 stimulated gene (ISG) expression.

45

## 46 **Introduction**

47 The pandemic spread of severe acute respiratory syndrome coronavirus 2 (SARS-CoV-2,  
48 SCV2; (1-3)) is an ongoing international health crisis with over 58 million infections and 1.3  
49 million reported deaths worldwide to date (WHO, <https://covid19.who.int>; November 2020).  
50 The spectrum of SCV2 related disease (COVID-19; coronavirus disease 2019) is highly  
51 variable, ranging from asymptomatic viral shedding to acute respiratory distress syndrome  
52 (ARDS), multi-organ failure, and death. Besides coughing, dyspnoea, and fatigue, fever (also  
53 known as pyrexia) is one of the most frequent symptoms of SCV2 infection (4-8). Fever is an  
54 evolutionarily conserved host response to microbial infection, which can influence the  
55 regulation of host innate and adaptive immune responses (9, 10). Unlike hyperthermia or heat  
56 stroke, fever represents a controlled shift in body temperature regulation induced by the  
57 expression of exogenous (microbial) and endogenous (host) pyrogenic regulatory factors,  
58 including PAMPS (pathogen associated molecular patterns) and pro-inflammatory cytokines  
59 (e.g. interleukin 6, IL-6) (9, 10). Body temperature naturally varies throughout the day, with  
60 age, sex, and ethnic origin being contributing factors to body temperature regulation (9, 10).  
61 In healthy middle-aged adults, fever is defined as a temperature range from 38 to 41°C ( $\Delta T$   
62  $\sim 1-4^\circ\text{C}$  above baseline), with low (38 to 39°C), moderate (39.1 to 40°C), high (40.1 to  
63 41.1°C), and hyperpyrexia ( $>41.1^\circ\text{C}$ ) febrile temperature ranges (10). Temperature elevation  
64 confers protection against a number of respiratory pathogens (9, 11), with antipyretic drug  
65 treatment shown to increase the mortality rate of intensive care unit (ICU) patients infected  
66 with influenza A virus (IAV) (12-14).

67 With respect to COVID-19, up to 90% of hospitalized patients show symptoms of  
68 fever (4-8). The majority of patients display low (44%) to moderate (13 to 34%) grade fever  
69 (4, 5). COVID-19 ICU patients also show a  $\sim 10\%$  higher prevalence of fever relative to non-  
70 ICU patients with milder disease manifestations (6, 15), suggesting fever to play a role during

71 COVID-19 disease progression. *In vitro* studies have shown that SCV2 replicates more  
72 efficiently at lower temperatures associated with the upper respiratory airway (33°C), which  
73 correlates with an overall weaker interferon (IFN)-mediated antiviral immune response  
74 relative to core body temperatures observed in the lower respiratory airway (37°C) (16).  
75 These data suggest that tissue temperature could be a significant determinant of SCV2  
76 tropism and immune regulation. However, it remains to be determined what effect  
77 temperature elevation above 37°C has on SCV2 infection. We therefore set out to determine  
78 the net effect of elevated temperature on SCV2 infection within respiratory epithelial tissue.

79 Utilizing a three-dimensional (3D) respiratory model that closely mimics the tissue  
80 physiology and cellular tropism of SCV2 infection observed in the respiratory airway of  
81 COVID-19 patients (16-24), we demonstrate that elevated temperature ( $\geq 39^{\circ}\text{C}$ ) restricts the  
82 replication and propagation of SCV2 in respiratory epithelium independently of the induction  
83 of type-I (IFN $\beta$ ) and type-III (IFN $\lambda$ ) IFN-mediated immune defences. We show that  
84 respiratory epithelium remains permissive to SCV2 infection at temperatures up to 40°C, but  
85 restricts viral transcription leading to significantly reduced levels of viral RNA (vRNA)  
86 accumulation and apical shedding of infectious virus. Importantly, we identify temperature to  
87 play an important role in the differential regulation of epithelial host responses to SCV2  
88 infection, including epigenetic, long non-coding RNA (lncRNA), and immunity-related  
89 pathways. Collectively, our data identify an important role for tissue temperature in the  
90 epithelial restriction of SCV2 replication in respiratory tissue independently of the induction  
91 of type-I and type-III IFN-mediated antiviral immune defences.

92

93

## 94 **Results**

### 95 **Differentiation of primary human bronchial epithelial cells into ciliated respiratory**

96 **epithelium supports SARS-CoV-2 replication *in vitro*.** In order to establish a respiratory

97 model suitable for studying the effect of temperature on SCV2 replication, we differentiated

98 primary human bronchiolar epithelial (HBE) cells (isolated from a male Caucasian donor

99 aged 63 years) into pseudostratified respiratory epithelium. Haematoxylin and Eosin (H&E)

100 and immunohistochemistry (IHC) staining of respiratory airway cultures demonstrated that

101 these tissues to contain a mixture of epithelial and goblet cells, with significant levels of

102 apical ciliation and expression of ACE2 (Figure 1A), the principal surface receptor for SCV2

103 and major determinant of tissue tropism (25-28). Infection of respiratory airway cultures with

104 SCV2 (strain England 2;  $10^4$  PFU/tissue) at 37°C demonstrated that these tissues support

105 SCV2 infection and replication, with intraepithelial and apical vRNA accumulation

106 detectable by *in situ* hybridization by 96 h post-infection (Figure 1A). Notably, we observed

107 discrete clusters of SCV2 RNA accumulation within the respiratory epithelium, indicative of

108 SCV2 cell-type specific tropism and/or localized patterns of immune restriction (see below;

109 (29, 30)). The overall morphology of the respiratory epithelium remained largely intact, with

110 little to no discernible shedding of the ciliated surface epithelium over the time course of

111 infection (Figure 1A). Measurement of genome copies (RT-qPCR) and infectious virus

112 (TCID<sub>50</sub>) within apical washes collected over time (24 to 144 h) demonstrated the linear

113 phase of virus shedding to occur between 48 and 96 h, with peak titres at 120 h post-infection

114 (Figure 1B to E).

115 In order to determine which cellular pathways were modulated in response to SCV2

116 infection, we performed RNA-Seq analysis on RNA extracted from mock-treated or SCV2-

117 infected respiratory cultures incubated at 37°C for 72 h, a time point in the linear phase of

118 viral shedding (Figure 1C to E). Out of the 787 differentially expressed genes (DEGs) (Figure

119 2A, Supplemental File S1;  $p < 0.05$ ,  $\geq 1.5$  or  $\leq -1.5$  log<sub>2</sub> Fold Change [log<sub>2</sub> FC]), pathway  
120 analysis identified DEG enrichment in immune system and cytokine related pathways to be  
121 significantly upregulated in SCV2-infected relative to mocked-treated tissues (Figure 2B, C  
122  $p < 0.0001$ ). Type-I (IFN $\beta$ , *IFNB1*) and type-III (IFN $\lambda$ , *IFNLI-3*) IFNs, along with a subset of  
123 interferon stimulated genes (ISGs; e.g. *BST2*, *ISG15*, *Mx1*, and *ZBP1* amongst others), and  
124 other pro-inflammatory cytokines (*IL6* and *IL32*) were upregulated (Figure 2D). Indirect  
125 immunofluorescence staining of tissue sections demonstrated that induced ISG expression  
126 coincided with productively infected areas of the respiratory epithelium (Figure 2E, *Mx1*),  
127 identifying localized areas of immune regulation within infected tissue. Our findings are  
128 consistent with previous reports showing that SCV2 infection induces an IFN-mediated  
129 antiviral immune response upon infection of epithelial tissue (16, 18-21, 30-32).

130

131 **Respiratory airway cultures induce a heat stress response at elevated temperature.** We  
132 next investigated the influence of temperature on our respiratory epithelium model. Mock  
133 treated respiratory cultures were incubated at 37, 39, or 40°C (representative of core body  
134 temperature and low to moderate grade febrile temperatures, respectively) for 72 h prior to  
135 tissue fixation or RNA extraction and RNA-Seq. H&E staining demonstrated no obvious  
136 morphological changes to the respiratory epithelium upon incubation at elevated temperature  
137 (Figure 3A), although an increase in epithelium thickness was detected relative to tissues  
138 incubated at 37°C (Figure 3B; 39°C  $p < 0.0001$ , 40°C  $p < 0.0001$ ). RNA-Seq analysis  
139 demonstrated no difference in the expression level of ACE2 (Figure 3C;  $p = 0.4001$ ) or a  
140 reference set of genes known to be constitutively expressed across a wide range of cell types  
141 and tissues (Figure 3D; 24 genes,  $p = 0.9106$ ; (33-35)). These data indicate that cellular  
142 transcription remains largely unperturbed at elevated temperatures up to 40°C. Out of the 650  
143 DEGs identified (Figure 3E, Supplemental File S2;  $p < 0.05$ ,  $\geq 1.5$  or  $\leq -1.5$  log<sub>2</sub> FC), pathway

144 analysis identified DEG enrichment in multiple pathways in tissues incubated at 40°C  
145 relative to 37°C, including meiotic recombination, DNA methylation, rRNA expression, and  
146 collagen metabolism (Figure 3F). DEG enrichment was also observed in cellular pathways  
147 relating to heat stress (Figure 3F black arrow, 3G; R-HSA-3371556) and cellular response to  
148 external stimuli (Figure 3G; R-HSA-8953897). Analysis of complete gene sets associated  
149 with the cellular response to heat stress (Figure 3H,  $p=0.0013$ ) or cellular response to heat  
150 (Figure S1,  $p=0.0018$ ; GO:0034605) identified that these pathways were upregulated in  
151 respiratory tissues incubated at 40°C relative to 37°C (Supplemental File S2). We conclude  
152 that our respiratory tissue model induces a heat stress response at elevated temperature  
153 without visible damage to the epithelium or induction of IFN-mediated antiviral immune  
154 defences.

155

156 **Elevated temperature restricts the replication of SARS-CoV-2 in respiratory airway**  
157 **cultures.** We next examined the effect of temperature on SCV2 replication in our 3D tissue  
158 model. Respiratory cultures were incubated at 37, 39, or 40°C for 24 h prior to mock  
159 treatment or SCV2 infection and continued incubation at their respective temperatures.  
160 Measurement of genome copies and infectious virus within apical washes collected over time  
161 (24 to 72 h) demonstrated that extracellular SCV2 titres were significantly decreased at both  
162 39 and 40°C relative to 37°C (Figure 4A to D). RT-qPCR analysis of RNA isolated from  
163 infected tissues at 72 h post-infection demonstrated significantly lower levels of intracellular  
164 vRNA in tissues incubated at 39 or 40°C (Figure 4E; 39°C  $p=0.0278$ , 40°C  $p=0.0033$ ). These  
165 data indicate that respiratory tissue remains permissive to SCV2 infection (tissue entry) but  
166 refractory to SCV2 replication at elevated temperatures  $\geq 39^\circ\text{C}$ . To our knowledge, these data  
167 identify for the first-time a temperature-dependent growth defect in SCV2 replication at  
168 elevated temperature ( $>37^\circ\text{C}$ ).

169 In order to examine the underlying mechanism(s) of this intracellular restriction, we  
170 compared the relative DEG profiles ( $p < 0.05$ ,  $\geq 1.5$  or  $\leq -1.5 \log_2$  FC) from mock-treated or  
171 SCV2-infected tissues at 37 or 40°C (Figure 5, S2, S3, Supplemental Files S1 to S4). Distinct  
172 patterns of DEG expression were detected between each paired condition analyzed (Figure  
173 5A, B; Supplemental File S5), with clusters of gene commonality (Figure 5B, purple lines) or  
174 shared gene pathway ontology (Figure 5B, blue lines). We also identified lncRNAs and  
175 micro-RNAs (miRNAs) to be differentially expressed between temperature and SCV2  
176 infection conditions (Figure S4; Supplemental File S6). Pathway analysis identified DEG  
177 enrichment to be highly specific for each paired condition analyzed, with a clear enrichment  
178 in immunity related pathways at 37°C relative to all other conditions (Figure 5C). These data  
179 indicate that tissue temperature plays an important role in the differential regulation of  
180 transcriptional host responses to SCV2 infection of epithelial tissue. To examine the  
181 influence of temperature on immune regulation further, we directly compared the  
182 transcriptome profiles from SCV2 infected tissues at 37 and 40°C. Out of the 859 DEGs  
183 identified (Figure 6A;  $p < 0.05$ ,  $\geq 1.5$  or  $\leq -1.5 \log_2$  FC), pathway analysis identified immune  
184 system and cytokine related pathways to be suppressed during SCV2 infection at 40°C  
185 relative to 37°C (Figure 6B, C; Supplemental File S7), findings consistent with a failure of  
186 SCV2 to induce the expression of type-I ( $\text{INF}\beta$ , *IFNB1*) or type-III ( $\text{INF}\lambda$ , *IFNL1-3*) IFNs at  
187 40°C (Figure 6D). Analysis of this subset of differentially expressed immune genes identified  
188 a decrease in gene expression during SCV2 infection at 40°C (mean  $\log_2$  counts per million  
189 [CPM] 1.147, SD 3.656) relative to mock treatment at 37°C (mean  $\log_2$  CPM 1.578, SD  
190 3.716; Figure 6C). These data suggest that SCV2 infection of respiratory tissue at 40°C is not  
191 sufficient to induce a robust innate immune response, indicating that the observed  
192 temperature restriction of SCV2 at elevated temperature occurs independently of IFN-  
193 mediated antiviral immune defences.



194 In order to substantiate these findings, we examined the influence of temperature on  
195 SCV2 replication in VeroE6 cells, a cell line derived from *Chlorocebus Sabaues* (African  
196 green monkey) known to be permissive to SCV2 infection but defective in type-I IFN-  
197 mediated immune defences (26, 36, 37). SCV2 replication was restricted at 40°C, but not  
198 39°C, relative to infection at 37°C with or without elevated temperature pre-incubation  
199 (Figure 7A to C). Transcriptomic analysis revealed significant differences in the baseline  
200 expression of genes associated with the cellular response to heat pathway (GO:0034605)  
201 between respiratory tissue and undifferentiated HBE (p=0.0142) or VeroE6 (p<0.0001) cells  
202 (Figure 7D, E), but not a reference set of genes expressed across a wide range of cell types  
203 and tissues (Figure 7F, G, Supplemental File S8; (33-35)). We posit that such differences in  
204 the constitutive expression of heat stress response genes is likely to influence the relative  
205 restriction of SCV2 upon temperature elevation in a cell type, and potentially species-  
206 specific, dependent manner. These data support our tissue analysis (Figure 4 to 6), which  
207 demonstrates that the temperature-dependent restriction of SCV2 to occur independently of  
208 the induction of IFN-mediated antiviral immune defences.

209 We next examined the stage at which SCV2 infection became restricted during  
210 infection of respiratory tissue at elevated temperature. RNA-Seq analysis of SCV2 infected  
211 tissues at 72 h post-infection demonstrated no significant difference in the total number of  
212 mapped reads (human + SCV2) between 37 and 40°C (Figure 8A, p=0.3429). However,  
213 analysis of viral reads identified a decrease in the relative abundance of viral transcripts  
214 mapping to multiple ORFs upon temperature elevation (Figure 8B to D, p<0.0010). Indirect  
215 immunofluorescence staining of tissue sections for SCV2 nucleocapsid (N) expression  
216 demonstrated significantly fewer clusters of SCV2 positive cells within infected tissues at  
217 40°C relative to 37°C (Figure 8E, F, p=0.0022). We conclude that infection of respiratory  
218 tissue at elevated temperature restricts SCV2 replication through a mechanism that inhibits

219 viral transcription independently of the induction of IFN-mediated antiviral immune defences  
220 that have been reported to restrict SCV2 propagation and spread (31, 38).

221

## 222 **Discussion**

223 A defining symptom of COVID-19 is the onset of fever with a febrile temperature range of  
224 38 to 41°C (4-8). However, the effect of elevated temperature on SCV2 tissue tropism and  
225 replication has remained to be determined. Here we identify a temperature-sensitive  
226 phenotype in SCV2 replication in respiratory epithelial tissue that occurs independently of  
227 the induction of IFN-mediated innate immune defences known to restrict SCV2 replication  
228 (31, 38). The differentiation of pseudostratified respiratory epithelium has proven to be a  
229 valuable research tool to investigate the cellular tropism, replication kinetics, and immune  
230 regulation of SCV2 infection, as these tissue models mimic many aspects of infection  
231 observed in animal models and COVID-19 patients (16-24, 29, 32, 39-42). While the use of  
232 such 3D models represents an important advancement over traditional 2D cell culture  
233 systems, the absence of circulating immune cells (e.g. macrophages, natural killer cells,  
234 dendritic cells, and neutrophils) which modulate fever and pro-inflammatory immune  
235 responses to microbial infection is an important limiting factor (9, 10, 43). Thus, we limit our  
236 conclusions to the effect of elevated temperature on SCV2 infection and replication within  
237 the respiratory epithelium. Additional animal studies are warranted to determine the overall  
238 net effect of fever and pro-inflammatory immune responses on body temperature  
239 thermoregulation and its corresponding influence on SCV2 tissue tropism and replication *in*  
240 *vivo*.

241 Consistent with previous reports (16, 18-21, 30-32), SCV2 infection of respiratory  
242 epithelium induced a pro-inflammatory immune response (Figure 2; IFN $\beta$ , IFN $\lambda$ 1-3, and IL-  
243 6). While SCV2 has been reported to induce a relatively weak IFN immune signature in

244 comparison to other respiratory viruses (e.g. IAV) (20, 44), we regularly observed localized  
245 areas of epithelial infection (Figure 1A, 2E, 8E) that were coincident with elevated levels of  
246 ISG expression (Figure 2E, Mx1). Our findings are consistent with reports that have shown  
247 similar patterns of localized infection in the respiratory airway of SCV2 infected ferrets and  
248 surface epithelium of organoid cultures (29, 30, 32, 45). These data indicate that SCV2  
249 induces a localized immune response during the opening phase of productive infection that is  
250 likely to restrict the progress of infection through the epithelium (Figure 1A) (30, 31, 38).  
251 Thus, differences in the proportion of epithelial infection and/or rate of intraepithelial spread  
252 may account for the observed differences in immune signatures between different respiratory  
253 pathogens (20, 46) and variance in apical yields of infectious virus at any given time point of  
254 analysis (Figure 1B and Figure 4B, D). As we observed localized areas of ISG induction  
255 (Figure 2E), our data support a model of epithelial infection where receptor-binding  
256 consumption kinetics of secreted IFN may limit cytokine diffusion and the intraepithelial  
257 induction of innate immune defences prior to the recruitment of immune cells and IFN $\gamma$   
258 secretion (47, 48).

259 We demonstrate that respiratory epithelial cultures induce a significant heat stress  
260 response upon temperature elevation without significant loss of tissue integrity, disruption to  
261 cellular transcription, diminished levels of ACE2 expression, or DAMP (damage associated  
262 molecular pattern) activation of immune defences at temperatures up to 40°C (Figure 3).  
263 Importantly, the elevation of temperature alone was not sufficient to inhibit SCV2 entry into  
264 respiratory tissue (Figure 4E), but restricted SCV2 replication leading to reduced levels of  
265 SCV2 apical shedding (Figure 4A to D). Thus, we identify tissue temperature to play an  
266 important role in the epithelial restriction of SCV2 replication. To our knowledge, these data  
267 represent the first account of a growth defect in SCV2 replication at febrile temperatures  
268 >37°C. Transcriptomic analysis identified substantial differences in the relative degree of

269 immune activation in respiratory tissue infected at 40°C (Figure 5 and 6), despite these  
270 tissues having abundant levels of intracellular vRNA (Figure 4E). We posit that the lack of  
271 immune induction observed at 40°C is likely a consequence of diminished levels of SCV2  
272 replication, as vRNA replication has previously been shown to play an important role in the  
273 production of PAMPs, including dsRNA intermediates, required for PRR detection and the  
274 activation of innate immune defences during respiratory virus infection (49-52). We also  
275 show the thermal restriction of SCV2 replication to occur in VeroE6 cells, a cell line  
276 permissive to SCV2 infection but defective in type-I IFN-mediated antiviral immune  
277 defences (26, 36, 37). Thus, we conclude that elevated temperature restricts SCV2 replication  
278 independently of the induction of ISG expression. Importantly, however, PRR detection of  
279 PAMPs which stimulate the production and secretion of pro-inflammatory cytokines  
280 (including IL-6) is a pre-requisite requirement for a fever response to microbial challenge *in*  
281 *vivo* (9, 10). Thus, additional animal studies are warranted to determine if the temperature  
282 restriction of SCV2 observed in respiratory cultures can occur independently of IFN-  
283 mediated immune defences *in vivo*. While speculative, we posit that low to moderate grade  
284 fever may confer protection to respiratory tissue within SCV2 infected individuals as a  
285 component of a homeostatically controlled non-hyperinflammatory immune response to  
286 infection.

287         While we identify temperature to play an important role in the regulation of SCV2  
288 replication in respiratory epithelia, the precise mechanism(s) of restriction remains to be  
289 determined and warrants further investigation. The induction of a heat stress response alone  
290 within respiratory tissue may be sufficient to limit SCV2 replication (Figure 2, Figure S3), as  
291 the activation and/or induction of stress response proteins has been shown to play both a  
292 positive (proviral) and negative (antiviral) role in the replication of many viruses (53-55).  
293 Our transcriptomic analysis identified epithelial host responses to be differentially regulated

294 in response to both temperature elevation and SCV2 infection (Figure 5 and 6), with unique  
295 profiles of induced gene expression between mock and SCV2 infected tissues at elevated  
296 temperature (Figure 5, Figure S2). Thus, SCV2 infection of respiratory epithelia at elevated  
297 temperature elicits a distinct host response that may directly contribute to the restriction of  
298 SCV2 propagation, for example the induction of mucins (Figure S2, *MUC4* and *MUC5AC*)  
299 which have been proposed to limit coronavirus disease progression and IAV replication (56,  
300 57). We also identified a significant difference in the differential expression of lncRNAs and  
301 miRNAs upon temperature elevation and SCV2 infection that warrants additional  
302 investigation (Figure S4), as changes in the relative expression of non-coding RNAs are  
303 known to influence the outcome of virus infection independently of IFN-mediated immune  
304 defences (58). Thus, multiple gene products and/or pathways may contribute to the sequential  
305 or accumulative restriction of SCV2 replication within respiratory tissue at elevated  
306 temperature.

307         Importantly, we identify elevated temperature to lead to lower levels of SCV2  
308 transcription and vRNA accumulation (Figure 4E, Figure 8D), suggesting that the  
309 temperature-dependent block in SCV2 propagation occurs prior to and/or during vRNA  
310 replication. We hypothesize that this block in transcription/replication may relate to the  
311 inhibition of SCV2 RNA-dependent RNA-polymerase (RdRp) activity or RdRp RNA  
312 binding affinity at elevated temperature, as the genomic replication activity of the IAV RdRp  
313 polymerase is known to be restricted at elevated temperature (41°C) (59). Notably, IAV cold-  
314 adaptation of RdRp activity has been shown to be a host determinant for avian IAV zoonosis,  
315 which naturally replicate at higher temperatures (41°C) within the intestinal tracts of birds  
316 (60). As circulating clinical strains of SCV2 are susceptible to non-synonymous mutations  
317 within RdRp coding sequences (<http://cov-glue.cvr.gla.ac.uk/#/home>), detailed molecular  
318 studies are warranted to determine if such amino acid substitutions influence the thermal

319 restriction of SCV2 replication. To our knowledge, no temperature sensitive growth defect  
320 for coronaviruses has been reported to date, although a temperature-sensitive (ts) coronavirus  
321 mutant has been identified for murine hepatitis virus (MHV, tsNC11) (61). The replication  
322 defect of tsNC11 was attributed to coding substitutions within the macrodomain and papain-  
323 like protease 2 domain of the non-structural protein 3, which displayed a severe growth  
324 defect at 40°C in DBT (Delayed Brain Tumor) cells, whereas wild-type MHV replicated to  
325 equivalent titres at 40°C to those observed at 37°C (61). Thus, we present the first evidence  
326 demonstrating that a circulating clinical strain of coronavirus is sensitive to temperature  
327 thermoregulation. As such, heat-adaptation gain of function experiments through serial  
328 passage of SCV2 in respiratory cultures incubated at  $\geq 39^\circ\text{C}$  may shed light on whether the  
329 temperature restriction of SCV2 observed is related to viral or cellular host factors, although  
330 appropriate levels of biosafety (ethical and genetic modification) should be considered prior  
331 to such experimentation.

332 In summary, we identify an important role for tissue temperature in the restriction of  
333 SCV2 replication in respiratory epithelia that occurs independently of the induction of IFN-  
334 mediated antiviral immune defences. We demonstrate tissue temperature to significantly  
335 influence the differential regulation of epithelial host responses induced in response to SCV2  
336 infection. Future investigation is warranted to determine the precise mechanism(s) of  
337 restriction, as this may uncover novel avenues for therapeutic intervention in the treatment of  
338 COVID-19.

339

340

341

342

343

## 344 **Materials and Methods**

### 345 **Virus**

346 Severe Acute Respiratory Syndrome Virus-2 (SARS-CoV-2, SCV2)

347 BetaCoV/England/02/2020/EPI\_ISL\_407073 was isolated from a COVID-19 patient (a gift  
348 from Public Health England). The virus was passaged three times in VeroE6 cells and  
349 genotype sequence confirmed by Illumina sequencing. All experiments were performed in a  
350 Biosafety level 3-laboratory at the MRC-University of Glasgow Centre for Virus Research  
351 (SAPO/223/2017/1a).

### 352 **SCV2 replication kinetics in VeroE6 cells**

353 VeroE6 cells (a gift from Michelle Bouloy, Institute Pasteur, France) were propagated in  
354 Dulbecco's Modified Eagle Medium (DMEM GlutaMAX; ThermoFisher, 31966-021)  
355 supplemented with 10% fetal calf serum (FCS; ThermoFisher, 10499044 [Lot Number  
356 08G8293K]) at 37°C with 5% CO<sub>2</sub>. Cells were seeded the day before infection at a density of  
357 2x10<sup>5</sup> cells per well in a 12-well plate and infected with 10<sup>4</sup> PFU of SCV2 diluted in serum-  
358 free DMEM for 120 minutes (mins) with occasional rocking. The inoculum was removed and  
359 replaced by DMEM + 10% FCS. Supernatant was collected every 24 hours (h) and snap-  
360 frozen prior to analysis. For temperature inhibition experiments, cells were either pre-  
361 incubated at 37, 39, or 40°C for 24 h prior to infection with continued incubation at their  
362 respective temperatures or incubated at the indicated temperatures after the addition of the  
363 medium.

### 364 **Differentiation of respiratory epithelium**

365 Primary human bronchiolar epithelial (HBE) cells from a healthy 63-year-old white  
366 Caucasian male (non-smoker) were sourced from Epithelix Sarl (Geneva, Switzerland). Cells  
367 were propagated at 37°C with 5% CO<sub>2</sub> in hAEC culture medium (Epithelix, EP09AM). All  
368 differentiation experiments were performed on cells that had been passaged a total of four

369 times. Cells were seeded onto transwells (Falcon, 734-0036) at a cell density of  $3 \times 10^4$  cells  
370 per transwell and grown to confluency. Cells were differentiated under air-liquid interface  
371 (ALI) in PneumaCult-ALI medium containing hydrocortisone and heparin supplements  
372 (STEMCELL Technologies, 05001) as specified by the manufacturer's guidelines. Cells were  
373 differentiated for a minimum of 35 days, with media changed every 48 h and twice weekly  
374 apical washing in serum-free DMEM after day 20 at ALI. ALI cultures were apically washed  
375 twice before infection, 24 h prior to infection and immediately preceding infection. Cultures  
376 were inoculated apically with 100  $\mu$ l of serum-free DMEM containing  $10^4$  PFU of SCV2  
377 (based on VeroE6 titres) for 120 mins. The inoculum was removed, and the apical surface  
378 washed once in serum-free DMEM (0 h time point). Unless stated otherwise, ALI cultures  
379 were incubated at 37°C with 5% CO<sub>2</sub>. For temperature inhibition experiments, ALI cultures  
380 were pre-incubated at 37, 39, or 40°C for 24 h prior to infection with continued incubation at  
381 their respective temperatures. Apical washing for 30 mins in 200  $\mu$ l of serum-free DMEM  
382 was used to collect infectious virus. Supernatants were divided into two 100  $\mu$ l aliquots; one  
383 for virus quantitation (TCID<sub>50</sub>) and the other for vRNA extraction in TRIzol (ThermoFisher,  
384 15596026; 1 in 3 dilution). Samples were stored at -80°C until required. Tissues were fixed at  
385 the indicated time points in 8% formaldehyde (Fisher Scientific, F/1501/PB17) for 16 to 24 h  
386 prior to paraffin embedding and processing.

### 387 **TCID<sub>50</sub>**

388 VeroE6 cells (subclone 6F5, MESO) were seeded the day before infection into 96-well-plates  
389 at a density of  $1.1 \times 10^5$  cells/well in DMEM + 10% FCS at 37°C with 5% CO<sub>2</sub>. Virus  
390 supernatants were serially diluted 1:10 in DMEM + 2% FCS in a total volume of 100  $\mu$ l.  
391 Cells were infected in triplicate and incubated for three days at 37°C with 5% CO<sub>2</sub>. The  
392 inoculum was removed and fresh media overlaid. Plates were incubated for three days at  
393 37°C in 5% CO<sub>2</sub>. Cells were fixed in 8% formaldehyde (Fisher Scientific, F/1501/PB17) for



394  $\geq 2.5$  h. Cytopathic effect was scored by staining with 0.1% Coomassie Brilliant Blue  
395 (BioRad, 1610406) in 45% methanol and 10% glacial acetic acid. TCID<sub>50</sub> was calculated  
396 according to Reed–Muench and Spearman–Kärber as described (62).

### 397 **Plaque assay**

398 VeroE6 cells were seeded at a density of  $2.5 \times 10^5$  cells/well in 12-well plates the day before  
399 infection. Ten-fold serial dilutions of virus were prepared in DMEM + 2% FCS in a total  
400 volume of 500  $\mu$ l. Cells were infected for 60 mins with occasional rocking at 37°C in 5%  
401 CO<sub>2</sub>. The inoculum was removed and 1 ml of overlay containing 0.6% Avicel (Avicel  
402 microcrystalline cellulose, RC-591) made up in DMEM containing 2% FCS was added to  
403 each well. Cells were incubated for three days at 37°C in 5% CO<sub>2</sub> prior to fixation in 8%  
404 formaldehyde and Coomassie brilliant blue staining (as described above). Plaques were  
405 counted manually and the plaque forming unit (PFU) per ml calculated.

### 406 **Reverse transcription quantitative PCR (RTq-PCR)**

407 RNA was extracted from TRIzol treated apical wash samples using a QIAGEN RNeasy Mini  
408 kit (Qiagen, 74106) following the manufacture's protocol. SCV2 RNA was quantified using a  
409 NEB Luna Universal Probe One-Step RT-qPCR Kit (New England Biolabs, E3006) and  
410 2019-nCoV CDC N1 primers and probes (IDT, 10006713). Genome copy numbers were  
411 quantified using a standard curve generated from serial dilutions of an RNA standard used  
412 throughout the study. The RNA standard was calibrated using a plasmid (2019-nCoV\_N;  
413 IDT, 10006625) that was quantified using droplet digital PCR. Values were normalized to  
414 copies/ml for apical washes or copies/tissue for cell-associated RNA.

### 415 ***In situ*-hybridization and immunostaining of respiratory tissue sections**

416 Paraffin-embedded tissues were sectioned using a microtome (~2-3  $\mu$ m thick) and mounted  
417 on glass slides. Tissue sections were stained with Haematoxylin and Eosin (H&E). For  
418 immunofluorescence staining, tissue sections underwent antigen retrieval by citrate (pH 6) or

419 EDTA (pH 8) pressure cooking (as indicated). RNAscope was used for the detection of  
420 SCV2 RNA using a Spike-specific probe set (Advanced Cell Diagnostics, 848561 and  
421 322372) following the manufacturer's protocol, which included a pre-treatment with boiling  
422 in target solution and proteinase K treatment. ACE2 was detected using a rabbit polyclonal  
423 anti-hACE2 antibody (Cell Signalling, 4355S; citrate antigen-retrieval) and EnVision+ anti-  
424 rabbit HRP (Agilent, K4003). Slides were scanned with a bright field slide scanner (Leica,  
425 Aperio Versa 8). Mx1 was detected using a mouse monoclonal anti-Mx1 antibody ((63);  
426 EDTA antigen-retrieval). SCV2 nucleocapsid protein was detected using a sheep polyclonal  
427 anti-SCV2 N protein antibody (University of Dundee, DA114; EDTA antigen-retrieval).  
428 Secondary antibodies for detection were rabbit anti-sheep AlexaFluor 555 (abcam, ab150182)  
429 and rabbit anti-mouse AlexaFluor 488 (Sigma-Aldrich, SAB4600056). Nuclei were stained  
430 with ProLong Gold (Life Technologies, P36941). Images were collected using a Zeiss LSM  
431 710 confocal microscope using 40x Plan-Apochromat oil objective lens (numerical aperture  
432 1.4) using 405, 488, and 543 nm laser lines. Zen black software (Zeiss) was used for image  
433 capture and exporting images, with minimal adjustment (image rotation) in Adobe Photoshop  
434 for presentation.

#### 435 **Tissue section image analysis**

436 Scanned Haematoxylin and Eosin (H&E) stained sections were analyzed using Aperio  
437 ImageScope analysis software (Leica). Epithelial thickness was measured by manually  
438 outlining the bottom and top surfaces of each epithelium (excluding cilia) and measuring the  
439 vertical point-to-point distance between each surface across the epithelium. One hundred  
440 evenly distributed distance measurements were acquired per epithelium per experimental  
441 condition in triplicate.

#### 442 **RNA sequencing (RNA-Seq)**

443 Transwell tissue or undifferentiated cells seeded into 12-well dishes at a cell density of  $2 \times 10^5$   
444 cells per well were harvested by scraping into TRIzol Reagent and transferred into tubes  
445 containing 2.8 mm ceramic beads (Stretton Scientific, P000916-LYSK0-A.0). Samples were  
446 homogenized (two 20 sec pulses with a 30 sec interval at room temperature, RT) using a  
447 Percellys Cryolys Evolution Super Homogeniser (Bertin Instruments, P000671-CLYS2-A) at  
448 5500 rounds per minute. The homogenised suspension was loaded into QIAshredder tubes  
449 (Qiagen, 79654) and centrifuged ( $12,000 \times g$  for 2 mins at RT). 0.25 ml of chloroform (VWR  
450 Life Sciences, 0757) was added to the eluate and incubated at RT for 7 mins prior to  
451 centrifugation ( $12,000 \times g$ , 15 minutes,  $4^\circ\text{C}$ ). The aqueous phase was transferred into a fresh  
452 tube, mixed with 250  $\mu\text{l}$  of 100% ethanol, and RNA isolated using RNeasy columns  
453 (Qiagen, 74104) following the manufacturer's protocol, that included a 15 min DNase  
454 treatment (Qiagen, 79254) treatment at RT. Eluted RNA was quantified using a NanoDrop  
455 2000 Spectrophotometer (ThermoFisher Scientific, ND-2000) and quality controlled on a  
456 TapeStation (Agilent Technologies, G2991AA). All samples had a RIN score of  $\geq 9$ . One  
457 microgram of total RNA was used to prepare libraries for sequencing using an Illumina  
458 TruSeq Stranded mRNA HT kit (Illumina, 20020594) and SuperScript2 Reverse  
459 Transcriptase (Invitrogen, 18064014)  
460 according to the manufacturer's instructions. Libraries were pooled in equimolar  
461 concentrations and sequenced using an Illumina NextSeq 500 sequencer (Illumina, FC-404-  
462 2005). At least 95% of the reads generated presented a Q score of  $\geq 30$ . RNA-Seq reads were  
463 quality assessed (FastQC; <http://www.bioinformatics.babraham.ac.uk/projects/fastqc>) and  
464 sequence adaptors removed (TrimGalore;  
465 [https://www.bioinformatics.babraham.ac.uk/projects/trim\\_galore/](https://www.bioinformatics.babraham.ac.uk/projects/trim_galore/)). RNA-Seq reads were  
466 aligned to the *Homo sapiens* genome (GRCh38) or *Chlorocebus Sabaeus* genome  
467 (ChlSab1.1), downloaded via Ensembl using HISAT2. HISAT2 is a fast and sensitive splice

468 aware mapper, which aligns RNA sequencing reads to mammalian-sized genomes using FM  
469 index strategy (64). RNA-Seq reads were also mapped to SARS-CoV-2 (GISAID accession  
470 ID:EPI\_ISL\_407073) using Bowtie2 (65). FeatureCount (66) was used to count reads  
471 mapping to gene annotation files. Reads counts were normalized to counts per million (CPM)  
472 unless otherwise stated. The edgeR package was used to calculate the gene expression level  
473 and to analyze differentially expressed genes between sample groups (67). Sequences have  
474 been deposited in the European Nucleotide Archive  
475 (<https://www.ebi.ac.uk/ena/browser/home>), accession number PRJEB41332. Only high  
476 confidence ( $p < 0.05$ ) differentially expressed genes (DEGs;  $\geq 1.5$  or  $\leq -1.5$  log<sub>2</sub> fold change,  
477 log<sub>2</sub> FC) were used for pathway analysis in Reactome (<https://reactome.org>) (68, 69) or  
478 differential pathway enrichment in Metascape  
479 (<https://metascape.org/gp/index.html#/main/step1>) (70). In Reactome, the gene mapping tool  
480 was used as a filter to identify pathways enriched (over-represented) for mapped DEG  
481 entities. FDR (False Discovery Rate) values  $< 0.05$  were considered significant for pathway  
482 enrichment. In Metascape, all DEGs were used for differential pathway analysis. Pathway p-  
483 values  $< 0.05$  were considered significant. Differentially expressed ( $p < 0.05$ ,  $\geq 1.5$  or  $\leq -1.5$  log<sub>2</sub>  
484 FC) lncRNAs and miRNAs were identified using the Ensembl BioMart tool  
485 (<http://www.ensembl.org/biomart/martview/05285d5f063a05a82b8ba71fe18a0f18>). Heat  
486 maps were plotted in GraphPad Prism (version 9). Mean counts per million (CPM) values of  
487 zero were normalized to 0.01 for log<sub>2</sub> presentation. Venn diagrams were plotted using  
488 <http://bioinformatics.psb.ugent.be/webtools/Venn/>.

#### 489 **Statistical analysis**

490 GraphPad Prism (version 9) was used for statistical analysis. For unpaired non-parametric  
491 data, a Kruskal-Wallis one-way ANOVA or Mann-Whitney *U*-test was applied. For paired  
492 non-parametric data, a one-way ANOVA Friedman test or Wilcoxon matched-pairs sign rank

493 test was applied. Statistical p-values are shown throughout. Statistically significant  
494 differences were accepted at  $p \leq 0.05$ .

495

## 496 **Acknowledgements**

497 The authors thank Lynn Marion Stevenson, Frazer Bell, and Lynn Oxford (College of  
498 Medical, Veterinary and Life Sciences, University of Glasgow) for their exceptional efforts  
499 during the UK lockdown. VH was funded by the German Research Foundation (Deutsche  
500 Forschungsgemeinschaft; project number 406109949) and the Federal Ministry of Food and  
501 Agriculture (BMEL; Förderkennzeichen: 01KI1723G). KD and PRM were funded by the  
502 Medical Research Council (MRC; MC\_UU\_12014/9 to PRM). JW was funded by an MRC  
503 CVR DTA award (MC\_ST\_U18018). DG was funded by an MRC-DTP award  
504 (MR/R502327/1). CR was funded by a BBSRC-CTP award (BB/R505341/1). QG was  
505 funded by the MRC (MC\_UU\_12014/12). IE was funded by a CSO project grant  
506 (TCS/19/11). MES was funded by the MRC (MC\_PC\_19026). AMS was funded by a  
507 UKRI/DHSC grant (BB/R019843/1 to Brian Willett, MRC-UoG CVR) and MRC CoV  
508 supplement grant (MC\_PC\_19026). RMP was funded by the MRC (MC\_UU\_12014/10).  
509 AMG was funded by studentship awards from the University of Glasgow School of  
510 Veterinary Medicine (Georgina D. Gardner, 145813; John Crawford, 123939). CB and SMF  
511 were funded by the MRC (MC\_UU\_12014/5 to CB).

512

## 513 **Availability of data**

514 The datasets generated and analyzed during the current study are available in the University  
515 of Glasgow data repository (a doi will be generated upon manuscript acceptance). RNA-Seq

516 data sets are available from the European Nucleotide Archive, accession number

517 PRJEB41332 (available upon manuscript acceptance).

518

### 519 **Author contributions**

520 VH, KD (joint first authors): Conceptualization, Data curation, Formal Analysis,

521 Investigation, Methodology, Project administration, Validation, Visualization, Writing –

522 original draft, Writing – review & editing.

523 JKW, RJ, CR, DG, IE, AS, SMF, QG: Data curation, Formal Analysis, Investigation,

524 Methodology, Validation

525 MS, AMS, RMP.: Resources, Methodology

526 AMG: Data curation, Formal Analysis

527 SG, PRM: Conceptualization, Funding acquisition, Methodology, Supervision, Writing –

528 review & editing.

529 CB: Conceptualization, Methodology, Data curation, Formal Analysis, Investigation,

530 Funding acquisition, Project administration, Supervision, Validation, Writing – Original

531 draft, Writing – review & editing.

532

### 533 **Conflicts of interest**

534 The authors declare no conflict of interest.

535

## 536 References

- 537 1. Zhu N, Zhang D, Wang W, Li X, Yang B, Song J, et al. A Novel Coronavirus from  
538 Patients with Pneumonia in China, 2019. *N Engl J Med*. 2020;382(8):727-33.
- 539 2. Lu R, Zhao X, Li J, Niu P, Yang B, Wu H, et al. Genomic characterisation and  
540 epidemiology of 2019 novel coronavirus: implications for virus origins and receptor binding.  
541 *Lancet*. 2020;395(10224):565-74.
- 542 3. Wu F, Zhao S, Yu B, Chen YM, Wang W, Song ZG, et al. A new coronavirus  
543 associated with human respiratory disease in China. *Nature*. 2020;579(7798):265-9.
- 544 4. Huang C, Wang Y, Li X, Ren L, Zhao J, Hu Y, et al. Clinical features of patients  
545 infected with 2019 novel coronavirus in Wuhan, China. *Lancet*. 2020;395(10223):497-506.
- 546 5. Guan WJ, Ni ZY, Hu Y, Liang WH, Ou CQ, He JX, et al. Clinical Characteristics of  
547 Coronavirus Disease 2019 in China. *N Engl J Med*. 2020;382(18):1708-20.
- 548 6. Fu L, Wang B, Yuan T, Chen X, Ao Y, Fitzpatrick T, et al. Clinical characteristics of  
549 coronavirus disease 2019 (COVID-19) in China: A systematic review and meta-analysis. *J*  
550 *Infect*. 2020;80(6):656-65.
- 551 7. Hoang A, Chorath K, Moreira A, Evans M, Burmeister-Morton F, Burmeister F, et al.  
552 COVID-19 in 7780 pediatric patients: A systematic review. *EClinicalMedicine*.  
553 2020;24:100433.
- 554 8. Xu T, Chen C, Zhu Z, Cui M, Chen C, Dai H, et al. Clinical features and dynamics of  
555 viral load in imported and non-imported patients with COVID-19. *Int J Infect Dis*.  
556 2020;94:68-71.
- 557 9. Evans SS, Repasky EA, Fisher DT. Fever and the thermal regulation of immunity: the  
558 immune system feels the heat. *Nat Rev Immunol*. 2015;15(6):335-49.
- 559 10. Ogoina D. Fever, fever patterns and diseases called 'fever'--a review. *J Infect Public*  
560 *Health*. 2011;4(3):108-24.
- 561 11. Foxman EF, Storer JA, Fitzgerald ME, Wasik BR, Hou L, Zhao H, et al.  
562 Temperature-dependent innate defense against the common cold virus limits viral replication  
563 at warm temperature in mouse airway cells. *Proc Natl Acad Sci U S A*. 2015;112(3):827-32.
- 564 12. Earn DJ, Andrews PW, Bolker BM. Population-level effects of suppressing fever.  
565 *Proc Biol Sci*. 2014;281(1778):20132570.
- 566 13. Schulman CI, Namias N, Doherty J, Manning RJ, Li P, Elhaddad A, et al. The effect  
567 of antipyretic therapy upon outcomes in critically ill patients: a randomized, prospective  
568 study. *Surg Infect (Larchmt)*. 2005;6(4):369-75.
- 569 14. Ryan M, Levy MM. Clinical review: fever in intensive care unit patients. *Crit Care*.  
570 2003;7(3):221-5.
- 571 15. Cao Z, Li T, Liang L, Wang H, Wei F, Meng S, et al. Clinical characteristics of  
572 Coronavirus Disease 2019 patients in Beijing, China. *PLoS One*. 2020;15(6):e0234764.
- 573 16. V'kovski P, Gultom M, Steiner S, Kelly J, Russeil J, Mangeat B, et al. Disparate  
574 temperature-dependent virus – host dynamics for SARS-CoV-2 and  
575 SARS-CoV in the human respiratory epithelium. 2020.
- 576 17. Zhu N, Wang W, Liu Z, Liang C, Wang W, Ye F, et al. Morphogenesis and  
577 cytopathic effect of SARS-CoV-2 infection in human airway epithelial cells. *Nat Commun*.  
578 2020;11(1):3910.
- 579 18. Chua RL, Lukassen S, Trump S, Hennig BP, Wendisch D, Pott F, et al. COVID-19  
580 severity correlates with airway epithelium-immune cell interactions identified by single-cell  
581 analysis. *Nat Biotechnol*. 2020;38(8):970-9.
- 582 19. Ravindra NG, Alfajaro MM, Gasque V, Wei J, Filler RB, Huston NC, et al. Single-  
583 cell longitudinal analysis of SARS-CoV-2 infection in human bronchial epithelial cells.  
584 bioRxiv. 2020.

- 585 20. Blanco-Melo D, Nilsson-Payant BE, Liu WC, Uhl S, Hoagland D, Moller R, et al.  
586 Imbalanced Host Response to SARS-CoV-2 Drives Development of COVID-19. *Cell*.  
587 2020;181(5):1036-45 e9.
- 588 21. Pizzorno A, Padey B, Julien T, Trouillet-Assant S, Traversier A, Errazuriz-Cerda E,  
589 et al. Characterization and Treatment of SARS-CoV-2 in Nasal and Bronchial Human  
590 Airway Epithelia. *Cell Rep Med*. 2020;1(4):100059.
- 591 22. Bradley BT, Maioli H, Johnston R, Chaudhry I, Fink SL, Xu H, et al. Histopathology  
592 and ultrastructural findings of fatal COVID-19 infections in Washington State: a case series.  
593 *Lancet*. 2020;396(10247):320-32.
- 594 23. Deshmukh V, Motwani R, Kumar A, Kumari C, Raza K. Histopathological  
595 observations in COVID-19: a systematic review. *J Clin Pathol*. 2020.
- 596 24. Polak SB, Van Gool IC, Cohen D, von der Thusen JH, van Paassen J. A systematic  
597 review of pathological findings in COVID-19: a pathophysiological timeline and possible  
598 mechanisms of disease progression. *Mod Pathol*. 2020;33(11):2128-38.
- 599 25. Li W, Moore MJ, Vasilieva N, Sui J, Wong SK, Berne MA, et al. Angiotensin-  
600 converting enzyme 2 is a functional receptor for the SARS coronavirus. *Nature*.  
601 2003;426(6965):450-4.
- 602 26. Hoffmann M, Kleine-Weber H, Schroeder S, Kruger N, Herrler T, Erichsen S, et al.  
603 SARS-CoV-2 Cell Entry Depends on ACE2 and TMPRSS2 and Is Blocked by a Clinically  
604 Proven Protease Inhibitor. *Cell*. 2020;181(2):271-80 e8.
- 605 27. Ziegler CGK, Allon SJ, Nyquist SK, Mbano IM, Miao VN, Tzouanas CN, et al.  
606 SARS-CoV-2 Receptor ACE2 Is an Interferon-Stimulated Gene in Human Airway Epithelial  
607 Cells and Is Detected in Specific Cell Subsets across Tissues. *Cell*. 2020;181(5):1016-35 e19.
- 608 28. Trypsteen W, Van Cleemput J, Snippenberg WV, Gerlo S, Vandekerckhove L. On the  
609 whereabouts of SARS-CoV-2 in the human body: A systematic review. *PLoS Pathog*.  
610 2020;16(10):e1009037.
- 611 29. Zaack LM, Scheibner D, Sehl J, Müller M, Hoffmann D, Beer M, et al. 3D  
612 reconstruction of 1 SARS-CoV-2 infection in ferrets emphasizes focal infection pattern in the  
613 upper respiratory tract. 2020.
- 614 30. Triana S, Metz Zumarán C, Ramirez C, Kee C, Doldan P, Shahraz M, et al. Single-  
615 cell analyses reveal SARS-CoV-2 interference with intrinsic immune response in the human  
616 gut. *bioRxiv*. 2020:2020.10.21.348854.
- 617 31. Stanifer ML, Kee C, Cortese M, Zumarán CM, Triana S, Mukenhirn M, et al. Critical  
618 Role of Type III Interferon in Controlling SARS-CoV-2 Infection in Human Intestinal  
619 Epithelial Cells. *Cell Rep*. 2020;32(1):107863.
- 620 32. Youk J, Kim T, Evans KV, Jeong YI, Hur Y, Hong SP, et al. Three-Dimensional  
621 Human Alveolar Stem Cell Culture Models Reveal Infection Response to SARS-CoV-2. *Cell*  
622 *Stem Cell*. 2020.
- 623 33. Moein S, Javanmard SH, Abedi M, Izadpanahi MH, Gheisari Y. Identification of  
624 Appropriate Housekeeping Genes for Gene Expression Analysis in Long-term Hypoxia-  
625 treated Kidney Cells. *Adv Biomed Res*. 2017;6:15.
- 626 34. Curina A, Termanini A, Barozzi I, Prosperini E, Simonatto M, Polletti S, et al. High  
627 constitutive activity of a broad panel of housekeeping and tissue-specific cis-regulatory  
628 elements depends on a subset of ETS proteins. *Genes Dev*. 2017;31(4):399-412.
- 629 35. Eisenberg E, Levanon EY. Human housekeeping genes, revisited. *Trends Genet*.  
630 2013;29(10):569-74.
- 631 36. Desmyter J, Melnick JL, Rawls WE. Defectiveness of interferon production and of  
632 rubella virus interference in a line of African green monkey kidney cells (Vero). *J Virol*.  
633 1968;2(10):955-61.



- 634 37. Mosca JD, Pitha PM. Transcriptional and posttranscriptional regulation of exogenous  
635 human beta interferon gene in simian cells defective in interferon synthesis. *Mol Cell Biol.*  
636 1986;6(6):2279-83.
- 637 38. Felgenhauer U, Schoen A, Gad HH, Hartmann R, Schaubmar AR, Failing K, et al.  
638 Inhibition of SARS-CoV-2 by type I and type III interferons. *J Biol Chem.*  
639 2020;295(41):13958-64.
- 640 39. Milewska A, Kula-Pacurar A, Wadas J, Suder A, Szczepanski A, Dabrowska A, et al.  
641 Replication of Severe Acute Respiratory Syndrome Coronavirus 2 in Human Respiratory  
642 Epithelium. *J Virol.* 2020;94(15).
- 643 40. Sia SF, Yan LM, Chin AWH, Fung K, Choy KT, Wong AYL, et al. Pathogenesis and  
644 transmission of SARS-CoV-2 in golden hamsters. *Nature.* 2020;583(7818):834-8.
- 645 41. Kim YI, Kim SG, Kim SM, Kim EH, Park SJ, Yu KM, et al. Infection and Rapid  
646 Transmission of SARS-CoV-2 in Ferrets. *Cell Host Microbe.* 2020;27(5):704-9 e2.
- 647 42. Hassan AO, Case JB, Winkler ES, Thackray LB, Kafai NM, Bailey AL, et al. A  
648 SARS-CoV-2 Infection Model in Mice Demonstrates Protection by Neutralizing Antibodies.  
649 *Cell.* 2020;182(3):744-53 e4.
- 650 43. Muralidharan S, Mandrekar P. Cellular stress response and innate immune signaling:  
651 integrating pathways in host defense and inflammation. *J Leukoc Biol.* 2013;94(6):1167-84.
- 652 44. Hadjadj J, Yatim N, Barnabei L, Corneau A, Boussier J, Smith N, et al. Impaired type  
653 I interferon activity and inflammatory responses in severe COVID-19 patients. *Science.*  
654 2020;369(6504):718-24.
- 655 45. Hao S, Ning K, Kuz CA, Vorhies K, Yan Z, Qiu J. Long-Term Modeling of SARS-  
656 CoV-2 Infection of In Vitro Cultured Polarized Human Airway Epithelium. *mBio.*  
657 2020;11(6).
- 658 46. Kindler E, Jonsdottir HR, Muth D, Hamming OJ, Hartmann R, Rodriguez R, et al.  
659 Efficient replication of the novel human betacoronavirus EMC on primary human epithelium  
660 highlights its zoonotic potential. *mBio.* 2013;4(1):e00611-12.
- 661 47. Oyler-Yaniv A, Oyler-Yaniv J, Whitlock BM, Liu Z, Germain RN, Huse M, et al. A  
662 Tunable Diffusion-Consumption Mechanism of Cytokine Propagation Enables Plasticity in  
663 Cell-to-Cell Communication in the Immune System. *Immunity.* 2017;46(4):609-20.
- 664 48. Oyler-Yaniv J, Oyler-Yaniv A, Shakiba M, Min NK, Chen YH, Cheng SY, et al.  
665 Catch and Release of Cytokines Mediated by Tumor Phosphatidylserine Converts Transient  
666 Exposure into Long-Lived Inflammation. *Mol Cell.* 2017;66(5):635-47 e7.
- 667 49. Tapia K, Kim WK, Sun Y, Mercado-Lopez X, Dunay E, Wise M, et al. Defective  
668 viral genomes arising in vivo provide critical danger signals for the triggering of lung  
669 antiviral immunity. *PLoS Pathog.* 2013;9(10):e1003703.
- 670 50. Killip MJ, Jackson D, Perez-Cidoncha M, Fodor E, Randall RE. Single-cell studies of  
671 IFN-beta promoter activation by wild-type and NS1-defective influenza A viruses. *J Gen  
672 Virol.* 2017;98(3):357-63.
- 673 51. Vasilijevic J, Zamarreno N, Oliveros JC, Rodriguez-Frandsen A, Gomez G,  
674 Rodriguez G, et al. Reduced accumulation of defective viral genomes contributes to severe  
675 outcome in influenza virus infected patients. *PLoS Pathog.* 2017;13(10):e1006650.
- 676 52. Russell AB, Elshina E, Kowalsky JR, Te Velthuis AJW, Bloom JD. Single-Cell Virus  
677 Sequencing of Influenza Infections That Trigger Innate Immunity. *J Virol.* 2019;93(14).
- 678 53. Li G, Zhang J, Tong X, Liu W, Ye X. Heat shock protein 70 inhibits the activity of  
679 Influenza A virus ribonucleoprotein and blocks the replication of virus in vitro and in vivo.  
680 *PLoS One.* 2011;6(2):e16546.
- 681 54. Hirayama E, Atagi H, Hiraki A, Kim J. Heat shock protein 70 is related to thermal  
682 inhibition of nuclear export of the influenza virus ribonucleoprotein complex. *J Virol.*  
683 2004;78(3):1263-70.

- 684 55. Wan Q, Song D, Li H, He ML. Stress proteins: the biological functions in virus  
685 infection, present and challenges for target-based antiviral drug development. *Signal*  
686 *Transduct Target Ther.* 2020;5(1):125.
- 687 56. Plante JA, Plante KS, Gralinski LE, Beall A, Ferris MT, Bottomly D, et al. Mucin 4  
688 Protects Female Mice from Coronavirus Pathogenesis. *bioRxiv.* 2020:2020.02.19.957118.
- 689 57. Ehre C, Worthington EN, Liesman RM, Grubb BR, Barbier D, O'Neal WK, et al.  
690 Overexpressing mouse model demonstrates the protective role of Muc5ac in the lungs. *Proc*  
691 *Natl Acad Sci U S A.* 2012;109(41):16528-33.
- 692 58. Wang P, Xu J, Wang Y, Cao X. An interferon-independent lncRNA promotes viral  
693 replication by modulating cellular metabolism. *Science.* 2017;358(6366):1051-5.
- 694 59. Dalton RM, Mullin AE, Amorim MJ, Medcalf E, Tiley LS, Digard P. Temperature  
695 sensitive influenza A virus genome replication results from low thermal stability of  
696 polymerase-cRNA complexes. *Virology.* 2006;358:3-58.
- 697 60. Long JS, Mistry B, Haslam SM, Barclay WS. Host and viral determinants of  
698 influenza A virus species specificity. *Nat Rev Microbiol.* 2019;17(2):67-81.
- 699 61. Deng X, Mettelman RC, O'Brien A, Thompson JA, E. T, O'Brien TE, et al. Analysis  
700 of Coronavirus Temperature-Sensitive Mutants Reveals an Interplay between the  
701 Macrodomain and Papain-Like Protease Impacting Replication and Pathogenesis. *Journal of*  
702 *Virology.* 2019;93(12):e021140-18.
- 703 62. Hierholzer JC, Killington RA. 2 - Virus isolation and quantitation. In: Mahy BWJ,  
704 Kangro HO, editors. *Virology Methods Manual.* London: Academic Press; 1996. p. 25-46.
- 705 63. Flohr F, Schneider-Schaulies S, Haller O, Kochs G. The central interactive region of  
706 human MxA GTPase is involved in GTPase activation and interaction with viral target  
707 structures. *FEBS Lett.* 1999;463(1-2):24-8.
- 708 64. Kim D, Langmead B, Salzberg SL. HISAT: a fast spliced aligner with low memory  
709 requirements. *Nat Methods.* 2015;12(4):357-60.
- 710 65. Langmead B, Salzberg SL. Fast gapped-read alignment with Bowtie 2. *Nat Methods.*  
711 2012;9(4):357-9.
- 712 66. Liao Y, Smyth GK, Shi W. featureCounts: an efficient general purpose program for  
713 assigning sequence reads to genomic features. *Bioinformatics.* 2014;30(7):923-30.
- 714 67. Robinson MD, McCarthy DJ, Smyth GK. edgeR: a Bioconductor package for  
715 differential expression analysis of digital gene expression data. *Bioinformatics.*  
716 2010;26(1):139-40.
- 717 68. Fabregat A, Jupe S, Matthews L, Sidiropoulos K, Gillespie M, Garapati P, et al. The  
718 Reactome Pathway Knowledgebase. *Nucleic Acids Res.* 2018;46(D1):D649-D55.
- 719 69. Jassal B, Matthews L, Viteri G, Gong C, Lorente P, Fabregat A, et al. The reactome  
720 pathway knowledgebase. *Nucleic Acids Res.* 2020;48(D1):D498-D503.
- 721 70. Zhou Y, Zhou B, Pache L, Chang M, Khodabakhshi AH, Tanaseichuk O, et al.  
722 Metascape provides a biologist-oriented resource for the analysis of systems-level datasets.  
723 *Nat Commun.* 2019;10(1):1523.
- 724

## 726 **Figure legends**

### 727 **Figure 1. Differentiation of primary bronchial epithelial airway cultures supports**

728 **SARS-CoV-2 replication.** Primary bronchiole epithelial cells were seeded onto 6.5mm  
729 transwells and grown to confluency prior to differentiation under air liquid interface (ALI)  
730 conditions for  $\geq 35$  days. Ciliated respiratory cultures were mock (media only) or SARS-CoV-  
731 2 (SCV2;  $10^4$  PFU/well) infected at  $37^\circ\text{C}$  for the indicated times (hours, h). (A)  
732 Representative images of H&E (left-hand panels), ACE2 (brown, middle panels), or  
733 detection of SCV2 RNA by *in situ* hybridization (red, right-hand panels) stained sections.  
734 Haematoxylin was used as a counter stain. Scale bars =  $20\ \mu\text{m}$ . (B/C) Genome copies per ml  
735 of SCV2 in apical washes harvested over time as determined RT-qPCR.  $N \geq 7$  derived from a  
736 minimum of three independent biological experiments per sample condition. (B) Black line,  
737 median; all data points shown. (C) Means and SD shown. (D) Specificity of RT-qPCR to  
738 detect vRNA in apical washes taken from mock (blue circles) or SCV2 infected (red circles)  
739 tissues at 72 h (as in B).  $N \geq 5$  derived from a minimum of three independent biological  
740 experiments per sample condition. Black line, median; all data points shown;  $p=0.0003$ ,  
741 Mann-Whitney *U*-test. (E) TCID<sub>50</sub> assay measuring infectious viral load in apical washes  
742 harvested from mock (blue circles) or SCV2 infected (red circles) tissues over time. Means  
743 and SD shown.  $N \geq 5$  derived from a minimum of three independent biological experiments  
744 per sample condition.

745

### 746 **Figure 2. SARS-CoV-2 infection of respiratory airway cultures induces a type-I and**

747 **type-III IFN response.** Ciliated respiratory cultures were mock (media only) or SARS-CoV-  
748 2 (SCV2;  $10^4$  PFU/well) infected at  $37^\circ\text{C}$  for 72 h prior to RNA extraction and RNA-Seq.  
749 (A) Scatter plots showing high confidence ( $p < 0.05$ ) differentially expressed gene (DEG)  
750 transcripts identified between mock and SCV2 infected cultures (grey circles); DEGs  $\geq 1.5$

751 log<sub>2</sub> FC, red circles; DEGs  $\leq -1.5$  log<sub>2</sub> FC, blue circles. (B) Reactome pathway analysis of  
752 mapped DEGs ( $p < 0.05$ ,  $\geq 1.5$  log<sub>2</sub> FC). Pathways enriched for DEGs with an FDR (corrected  
753 over-representation *P* value)  $< 0.05$  (plotted as  $-\log_{10}$  FDR) shown (red bars). Dotted line,  
754 threshold of significance ( $-\log_{10}$  FDR of 0.05). (C) Expression profile (log<sub>2</sub> CPM) of  
755 Immune system (R-HSA168256) related DEGs (identified in B). Black line, median; dotted  
756 lines; 5<sup>th</sup> and 95<sup>th</sup> percentile range;  $p < 0.0001$ , Mann-Whitney *U*-test. (D) Expression levels  
757 (log<sub>2</sub> CPM) of individual Immune system DEGs (identified in B);  $p < 0.0001$ , Wilcoxon  
758 matched-pairs sign rank test. (A to D) RNA-Seq data derived from RNA isolated from three  
759 technical replicates per sample condition. Data analysis is presented in Supplemental File S1.  
760 (E) Indirect immunofluorescence staining of tissue sections showing Mx1 (green) and SCV2  
761 nucleocapsid (N, red) epithelial localization. Nuclei were stained with DAPI. Scale bars = 20  
762  $\mu\text{m}$ .

763

764 **Figure 3. Respiratory airway cultures induce a heat stress response upon incubation at**  
765 **elevated temperature.** Ciliated respiratory cultures were incubated at 37, 39, or 40°C for 72  
766 h prior to fixation or RNA extraction and RNA-Seq. (A) Representative images of H&E  
767 stained sections. Scale bars = 20  $\mu\text{m}$ . (B) Quantitation of respiratory tissue thickness ( $\mu\text{m}$ ) at  
768 72 h. N=300 measurements derived from three technical replicates per sample condition.  
769 Black line, median; dotted lines; 5<sup>th</sup> and 95<sup>th</sup> percentile range; p-values shown, one-way  
770 ANOVA Kruskal-Wallis test. (C) ACE2 expression levels (CPM) in respiratory cultures  
771 incubated at 37 or 40°C; means and SD shown;  $p = 0.4001$ , Mann-Whitney *U*-test. (D)  
772 Expression values (log<sub>2</sub> CPM) of a reference gene set (24 genes; (33-35)) in respiratory  
773 cultures incubated at 37 or 40°C;  $p = 0.9106$ , Mann-Whitney *U*-test. (E) Scatter plots showing  
774 high confidence ( $p < 0.05$ ) differentially expressed gene (DEG) transcripts identified between  
775 respiratory cultures incubated at 37 or 40°C (grey circles); DEGs  $\geq 1.5$  log<sub>2</sub> FC, red circles;

776 DEGs  $\leq -1.5 \log_2$  FC, blue circles. (F) Reactome pathway analysis of mapped DEGs ( $p < 0.05$ ,  
777  $\geq 1.5 \log_2$  FC). Pathways enriched for DEGs with an FDR  $< 0.05$  (plotted as  $-\log_{10}$  FDR)  
778 shown (red bars; every 4<sup>th</sup> bar labelled). Dotted line, threshold of significance ( $-\log_{10}$  FDR of  
779 0.05). (G) Expression values ( $\log_2$  CPM) of DEGs identified with cellular response to heat  
780 stress (R-HSA-3371556; arrow in B) and cellular response to external stimuli (R-HSA-  
781 8953897) pathways;  $p = 0.001$ , Wilcoxon matched-pairs sign ranked test. (H) Expression  
782 levels ( $\log_2$  CPM) for all genes associated with cellular response to heat stress pathway (R-  
783 HSA-3371556);  $p = 0.0013$ , Wilcoxon matched-pairs sign ranked test. (C to H) RNA-Seq data  
784 derived from RNA isolated from three technical replicates per sample condition. Data  
785 analysis is presented in Supplemental File S2.

786

787 **Figure 4. Elevated temperature restricts SARS-CoV-2 replication in respiratory airway**

788 **cultures.** Ciliated respiratory cultures were incubated at 37, 39, or 40°C for 24 h prior to  
789 mock (media only) or SARS-CoV-2 (SCV2;  $10^4$  PFU/well) infection and incubation at the  
790 indicated temperatures. Apical washes were collected over time (as indicated) and tissues  
791 harvested at 72 h for RNA extraction and RNA-Seq. (A/B) Genome copies per ml of SCV2  
792 in apical washes harvested over time as determined RT-qPCR.  $N \geq 11$  derived from a  
793 minimum of three independent biological experiments per sample condition. (A) Means and  
794 SD shown. (B) Black line, median; whisker, 95% confidence interval; all data points shown;  
795 p-values shown, one-way ANOVA Kruskal-Wallis test. (C/D) TCID<sub>50</sub> assay measuring  
796 infectious viral load in apical washes harvested from SCV2 infected respiratory cultures over  
797 time.  $N \geq 11$  derived from a minimum of three independent biological experiments. (C) Means  
798 and SD shown. (D) Black line, median; whisker, 95% confidence interval; all data points  
799 shown; p-values shown, one-way ANOVA Kruskal-Wallis test. (E) Genome copies per tissue  
800 of SCV2 as determined RT-qPCR.  $N \geq 11$  derived from a minimum of three independent

801 biological experiments per sample condition. Black line, median; whisker, 95% confidence  
802 interval; all data points shown; p-values shown, one-way ANOVA Kruskal-Wallis test.  
803  
804 **Figure 5. Respiratory airway cultures induce distinct transcriptional host responses to**  
805 **SARS-CoV-2 infection at elevated temperature.** Ciliated respiratory cultures were  
806 incubated at 37 or 40°C for 24 h prior to mock (media only) or SARS-CoV-2 (SCV2; 10<sup>4</sup>  
807 PFU/well) infection. Tissue were incubated at their respective temperatures for 72 h prior to  
808 RNA extraction and RNA-Seq. DEGs ( $p < 0.05$ ,  $\geq 1.5 \log_2 \text{FC}$  [top panels] or  $\leq -1.5 \log_2 \text{FC}$   
809 [bottom panels]) were identified for each paired condition; blue ellipses, SCV2 37°C/Mock  
810 37°C (SCV37/Mock37); green ellipses, SCV2 40°C/Mock 40°C (SCV40/Mock40); red  
811 ellipses, SCV2 40°C/Mock 37°C (SCV40/Mock37); yellow ellipses, Mock 40°C/Mock 37°C  
812 (Mock40/Mock37). (A) Venn diagram showing the number of unique or shared DEGs  
813 between each paired condition analyzed. (B) Circos plot showing the proportion of unique  
814 (light orange inner circle) or shared (dark orange inner circle + purple lines) DEGs between  
815 each paired condition analyzed. Blue lines, DEGs which share pathway gene ontology terms.  
816 (C) Metascape pathway analysis showing DEG enrichment p-value ( $-\log_{10}$ ) for each paired  
817 condition analyzed. Grey boxes,  $p > 0.05$ . (A to C) RNA-Seq data derived from RNA isolated  
818 from three technical replicates per sample condition. Data analysis is presented in  
819 Supplemental Files S1 to S5.

820

821 **Figure 6. Elevated temperature restricts SARS-CoV-2 replication in respiratory airway**  
822 **cultures independently of the induction of IFN-mediated innate immune defences.**

823 Ciliated respiratory cultures were incubated at 37 or 40°C for 24h prior to mock (media) or  
824 SARS-CoV-2 (SCV2; 10<sup>4</sup> PFU/well) infection. Tissue were incubated at their respective  
825 temperatures for 72 h prior to RNA extraction and RNA-Seq. (A) Scatter plots showing high

826 confidence ( $p < 0.05$ ) differentially expressed gene (DEG) transcripts identified between 37  
827 and 40°C SCV2 infected respiratory cultures (grey circles); DEGs  $\geq 1.5 \log_2$  FC, red circles;  
828 DEGs  $\leq -1.5 \log_2$  FC, blue circles. (B) Reactome pathway analysis of mapped DEGs  
829 ( $p < 0.05$ ,  $\leq -1.5 \log_2$  FC). Pathways enriched for DEGs with an FDR  $< 0.05$  (plotted as  $-\log_{10}$   
830 FDR) shown (blue bars). Dotted line, threshold of significance ( $-\log_{10}$  FDR of 0.05). (C)  
831 Expression profile ( $\log_2$  CPM) of Immune system (R-HSA168256) DEGs (identified in B)  
832 relative to expression levels in Mock tissue incubated at 37 and 40°C. Black line, median;  
833 dotted lines, 5<sup>th</sup> and 95<sup>th</sup> percentile range; p-values shown, Wilcoxon matched-pairs signed  
834 rank test (top), one-way ANOVA Friedman test (bottom). (D) Expression levels ( $\log_2$  CPM)  
835 for individual Immune system (R-HAS-168256) DEGs (identified in B) relative to mock at  
836 37 and 40°C. (A to D) RNA-Seq data derived from RNA isolated from three technical  
837 replicates per sample condition. Data analysis is presented in Supplemental File S7.

838

839 **Figure 7. Elevated temperature restricts SARS-CoV-2 replication in VeroE6 cells.**

840 Permissive VeroE6 cells were infected with SARS-CoV-2 (SCV2;  $10^4$  PFU/well) at 37°C  
841 prior to temperature elevation and incubation at 37, 39, or 40°C (A/B) or pre-incubated at 37,  
842 39, or 40°C for 24 h prior to infection and continued incubation at their respective  
843 temperatures (C). (A) TCID<sub>50</sub> growth curve of SCV2 infected VeroE6 cells incubated at 37°C  
844 over time (h). Means and SD shown. (B/C) TCID<sub>50</sub> viral titres at 24 and 48 h post-infection.  
845 Left-hand panel; means and SD. Right-hand panel; black line, median; whisker, 95%  
846 confidence interval; all data points shown; p-values shown, one-way ANOVA Kruskal-  
847 Wallis test. (A-C) N=9 derived from a minimum of three independent biological experiments  
848 per sample condition. (D) Expression profile ( $\log_2$  CPM) for genes associated with cellular  
849 response to heat (GO:0034605) in respiratory cultures (Resp. tissue), undifferentiated  
850 primary HBE, and VeroE6 cells incubated at 37°C; p-values shown, One-way ANOVA

851 Friedman test. (E) Expression levels (log<sub>2</sub> CPM) of individual genes associated with cellular  
852 response to heat (as in D). (F) Expression profile (log<sub>2</sub> CPM) of a reference gene set (18  
853 genes; (33-35)); p-values shown, One-way ANOVA Friedman test. (G) Expression values  
854 (log<sub>2</sub> CPM) of a reference gene set (as in F). (D to G) RNA-Seq data derived from RNA  
855 isolated from three technical replicates per sample condition. Data analysis is presented in  
856 Supplemental File S8.

857

858 **Figure 8. Elevated temperature restricts SARS-CoV-2 transcription in respiratory**

859 **airway cultures.** Ciliated respiratory cultures were incubated at 37 or 40°C for 24 h prior to  
860 mock (media only) or SARS-CoV-2 (SCV2; 10<sup>4</sup> PFU/well) infection. Tissue were incubated  
861 at their respective temperatures for 72 h prior to RNA extraction and RNA-Seq. (A) Total  
862 mapped reads (MR; human + SCV2) from infected tissues; means and SD shown; p=0.3429,  
863 one-way ANOVA Kruskal-Wallis test. (B) SCV2 mapped reads from infected tissues; means  
864 and SD shown. (C) % SCV2 mapped reads of total mapped read count (human + SCV2);  
865 means and SD shown. (D) Expression values (log<sub>2</sub> MR) of SCV2 gene transcripts; p<0.0010,  
866 Wilcoxon matched-pairs sign rank test. (A-D) RNA-Seq data derived from RNA isolated  
867 from three technical replicates per sample condition. (E) Indirect immunofluorescence  
868 staining of tissue sections showing SCV2 nucleocapsid (N, red) epithelial localization. Nuclei  
869 were stained with DAPI. Scale bars = 20 μm. (F) Quantitation of SCV2 N infectious foci in  
870 respiratory tissue sections. N=6 independently stained tissue sections per sample condition.  
871 Black line, median; whisker, 95% confidence interval; all data points shown; p=0.0022,  
872 Mann-Whitney *U*-test.

873

874 **Figure S1. Respiratory airway cultures induce a heat stress response.** Ciliated respiratory

875 cultures were incubated at 37 or 40°C for 72 h prior to RNA extraction and RNA-Seq. Heat



876 map showing expression values ( $\log_2$  CPM) of genes associated with the cellular response to  
877 heat pathway (GO: 0034605);  $p=0.0018$ , Wilcoxon matched-pairs sign rank test; every  
878 second row labelled. RNA-Seq data derived from RNA isolated from three technical  
879 replicates per sample condition. Data analysis is presented in Supplemental File S2.

880

881 **Figure S2. Identification of DEGs in mock and SARS-CoV-2 infected respiratory**

882 **cultures incubated at 40°C.** Ciliated respiratory cultures were incubated at 40°C for 24 h

883 prior to mock (media only) or SARS-CoV-2 (SCV2;  $10^4$  PFU/well) infection and continued

884 incubation at 40°C. Tissues were harvested at 72 h for RNA extraction and RNA-Seq. (A)

885 Scatter plots showing high confidence ( $p<0.05$ ) differentially expressed gene (DEG)

886 transcripts identified between mock and SCV2 infected respiratory cultures at 40°C (grey

887 circles); DEGs  $\geq 1.5 \log_2$  FC, red circles; DEGs  $\leq -1.5 \log_2$  FC, blue circles. (B) Reactome

888 pathway analysis of mapped DEGs ( $p<0.05$ ,  $\geq 1.5 \log_2$  FC [red bars] or  $\leq -1.5 \log_2$  FC [blue

889 bars]). Top 10 enriched pathways shown. Dotted line, threshold of significance ( $-\log_{10}$  FDR

890 of 0.05). (C) Expression values ( $\log_2$  CPM) of Reactome mapped DEGs; p-values shown,

891 Wilcoxon matched-pairs sign rank test. (A to C) RNA-Seq data derived from RNA isolated

892 from three technical replicates per sample condition. Data analysis is presented in

893 Supplemental File S3.

894

895

896 **Figure S3. Identification of DEGs in mock and SARS-CoV-2 infected respiratory**

897 **cultures incubated at 37 and 40°C, respectively.** Ciliated respiratory cultures were

898 incubated at 37 or 40°C for 24 h prior to mock (media only) or SARS-CoV-2 (SCV2;  $10^4$

899 PFU/well) infection and continued incubation at their respective temperatures. Tissues were

900 harvested at 72 h for RNA extraction and RNA-Seq. (A) Scatter plots showing high

901 confidence ( $p < 0.05$ ) differentially expressed gene (DEG) transcripts identified between mock  
902 ( $37^{\circ}\text{C}$ ) and SCV2 infected ( $40^{\circ}\text{C}$ ) respiratory cultures (grey circles); DEGs  $\geq 1.5 \log_2 \text{FC}$ ,  
903 red circles; DEGs  $\leq -1.5 \log_2 \text{FC}$ , blue circles. (B) Reactome pathway analysis of mapped  
904 DEGs ( $p < 0.05$ ,  $\geq 1.5 \log_2 \text{FC}$  [red bars, every sixth row labelled] or  $\leq -1.5 \log_2 \text{FC}$  [blue  
905 bars]). Dotted line, threshold of significance ( $-\log_{10} \text{FDR}$  of 0.05). Black arrow,  
906 identification of cellular response to heat stress pathway. (C) Expression values ( $\log_2 \text{CPM}$ )  
907 of Reactome mapped DEGs; p-values shown, Wilcoxon matched-pairs sign rank test. Every  
908 third column labelled. (A to C) RNA-Seq data derived from RNA isolated from three  
909 technical replicates per sample condition. Data analysis is presented in Supplemental File S4.  
910

911 **Figure S4. Respiratory airway cultures induce distinct lncRNA and miRNA**  
912 **transcriptional host responses to SARS-CoV-2 infection at elevated temperature.**  
913 Ciliated respiratory cultures were incubated at  $37$  or  $40^{\circ}\text{C}$  for 24 h prior to mock (media  
914 only) or SARS-CoV-2 (SCV2;  $10^4 \text{PFU/well}$ ) infection. Tissue were incubated at their  
915 respective temperatures for 72 h prior to RNA extraction and RNA-Seq. DEGs ( $p < 0.05$ ,  $\geq 1.5$   
916  $\log_2 \text{FC}$  [top panels] or  $\leq -1.5 \log_2 \text{FC}$  [bottom panels]) were identified for each paired  
917 condition; blue circles/ellipses, SCV2  $37^{\circ}\text{C}/\text{Mock } 37^{\circ}\text{C}$  (SCV37/Mock37); green  
918 circles/ellipses, SCV2  $40^{\circ}\text{C}/\text{Mock } 40^{\circ}\text{C}$  (SCV40/Mock40); red circles/ellipses, SCV2  
919  $40^{\circ}\text{C}/\text{Mock } 37^{\circ}\text{C}$  (SCV40/Mock37); yellow circles/ellipses, Mock  $40^{\circ}\text{C}/\text{Mock } 37^{\circ}\text{C}$   
920 (Mock40/Mock37). (A) Proportion of lncRNA + miRNA (grey numbers and lines [relative  
921 %]) identified per DEG population (coloured numbers and lines [relative %]). (B) Venn  
922 diagram showing the number of unique or shared lncRNA + miRNAs identified between  
923 each paired condition analyzed. (C) Circos plot showing the proportion of unique (light  
924 orange inner circle) or shared (dark orange inner circle + purple lines) lncRNA + miRNAs  
925 between each paired condition analyzed. (D) Expression values ( $\log_2 \text{CPM}$ ) of lncRNA +

926 miRNA identified per sample condition analyzed; p-values shown, one-way ANOVA  
927 Friedman test (top), Wilcoxon matched-pairs sign rank test (bottom). (A to D) RNA-Seq data  
928 derived from RNA isolated from three technical replicates per sample condition. Data  
929 analysis is presented in Supplemental File S6.

930

### 931 **Supplementary Files**

932 **Supplemental File S1.** RNA-Seq data analysis for mock (Mck)-treated or SARS-CoV-2  
933 (SCV2) infected respiratory tissues at 37°C.

934 **Supplemental File S2.** RNA-Seq data analysis for mock (Mck)-treated respiratory tissues  
935 incubated at 37 and 40°C.

936 **Supplemental File S3.** RNA-Seq data analysis for mock (Mck)-treated or SARS-CoV-2  
937 (SCV2) infected respiratory tissues at 40°C.

938 **Supplemental File S4.** RNA-Seq data analysis for mock (Mck)-treated or SARS-CoV-2  
939 (SCV2) infected respiratory tissues at 37°C and 40°C, respectively.

940 **Supplemental File S5.** Comparative DEG analysis of RNA-Seq data derived from mock  
941 (Mck)-treated or SARS-CoV-2 (SCV2) infected respiratory tissues at 37 and 40°C.

942 Supplemental Files S1-S4.

943 **Supplemental File S6.** Comparative lncRNA and miRNA DEG analysis of RNA-Seq data  
944 derived from mock (Mck)-treated or SARS-CoV-2 (SCV2) infected respiratory tissues at 37  
945 and 40°C. Supplemental Files S1-S4.

946 **Supplemental File S7.** RNA-Seq data analysis for SARS-CoV-2 (SCV2) infected respiratory  
947 tissues at 37 and 40°C.

948 **Supplemental File S8.** DEG analysis of the Cellular response to heat (GO:0034605) from  
949 RNA-Seq data derived from mock (Mck)-treated respiratory tissues (Resp. tissue) and  
950 undifferentiated HBEC and VeroE6 cells incubated at 37°C.

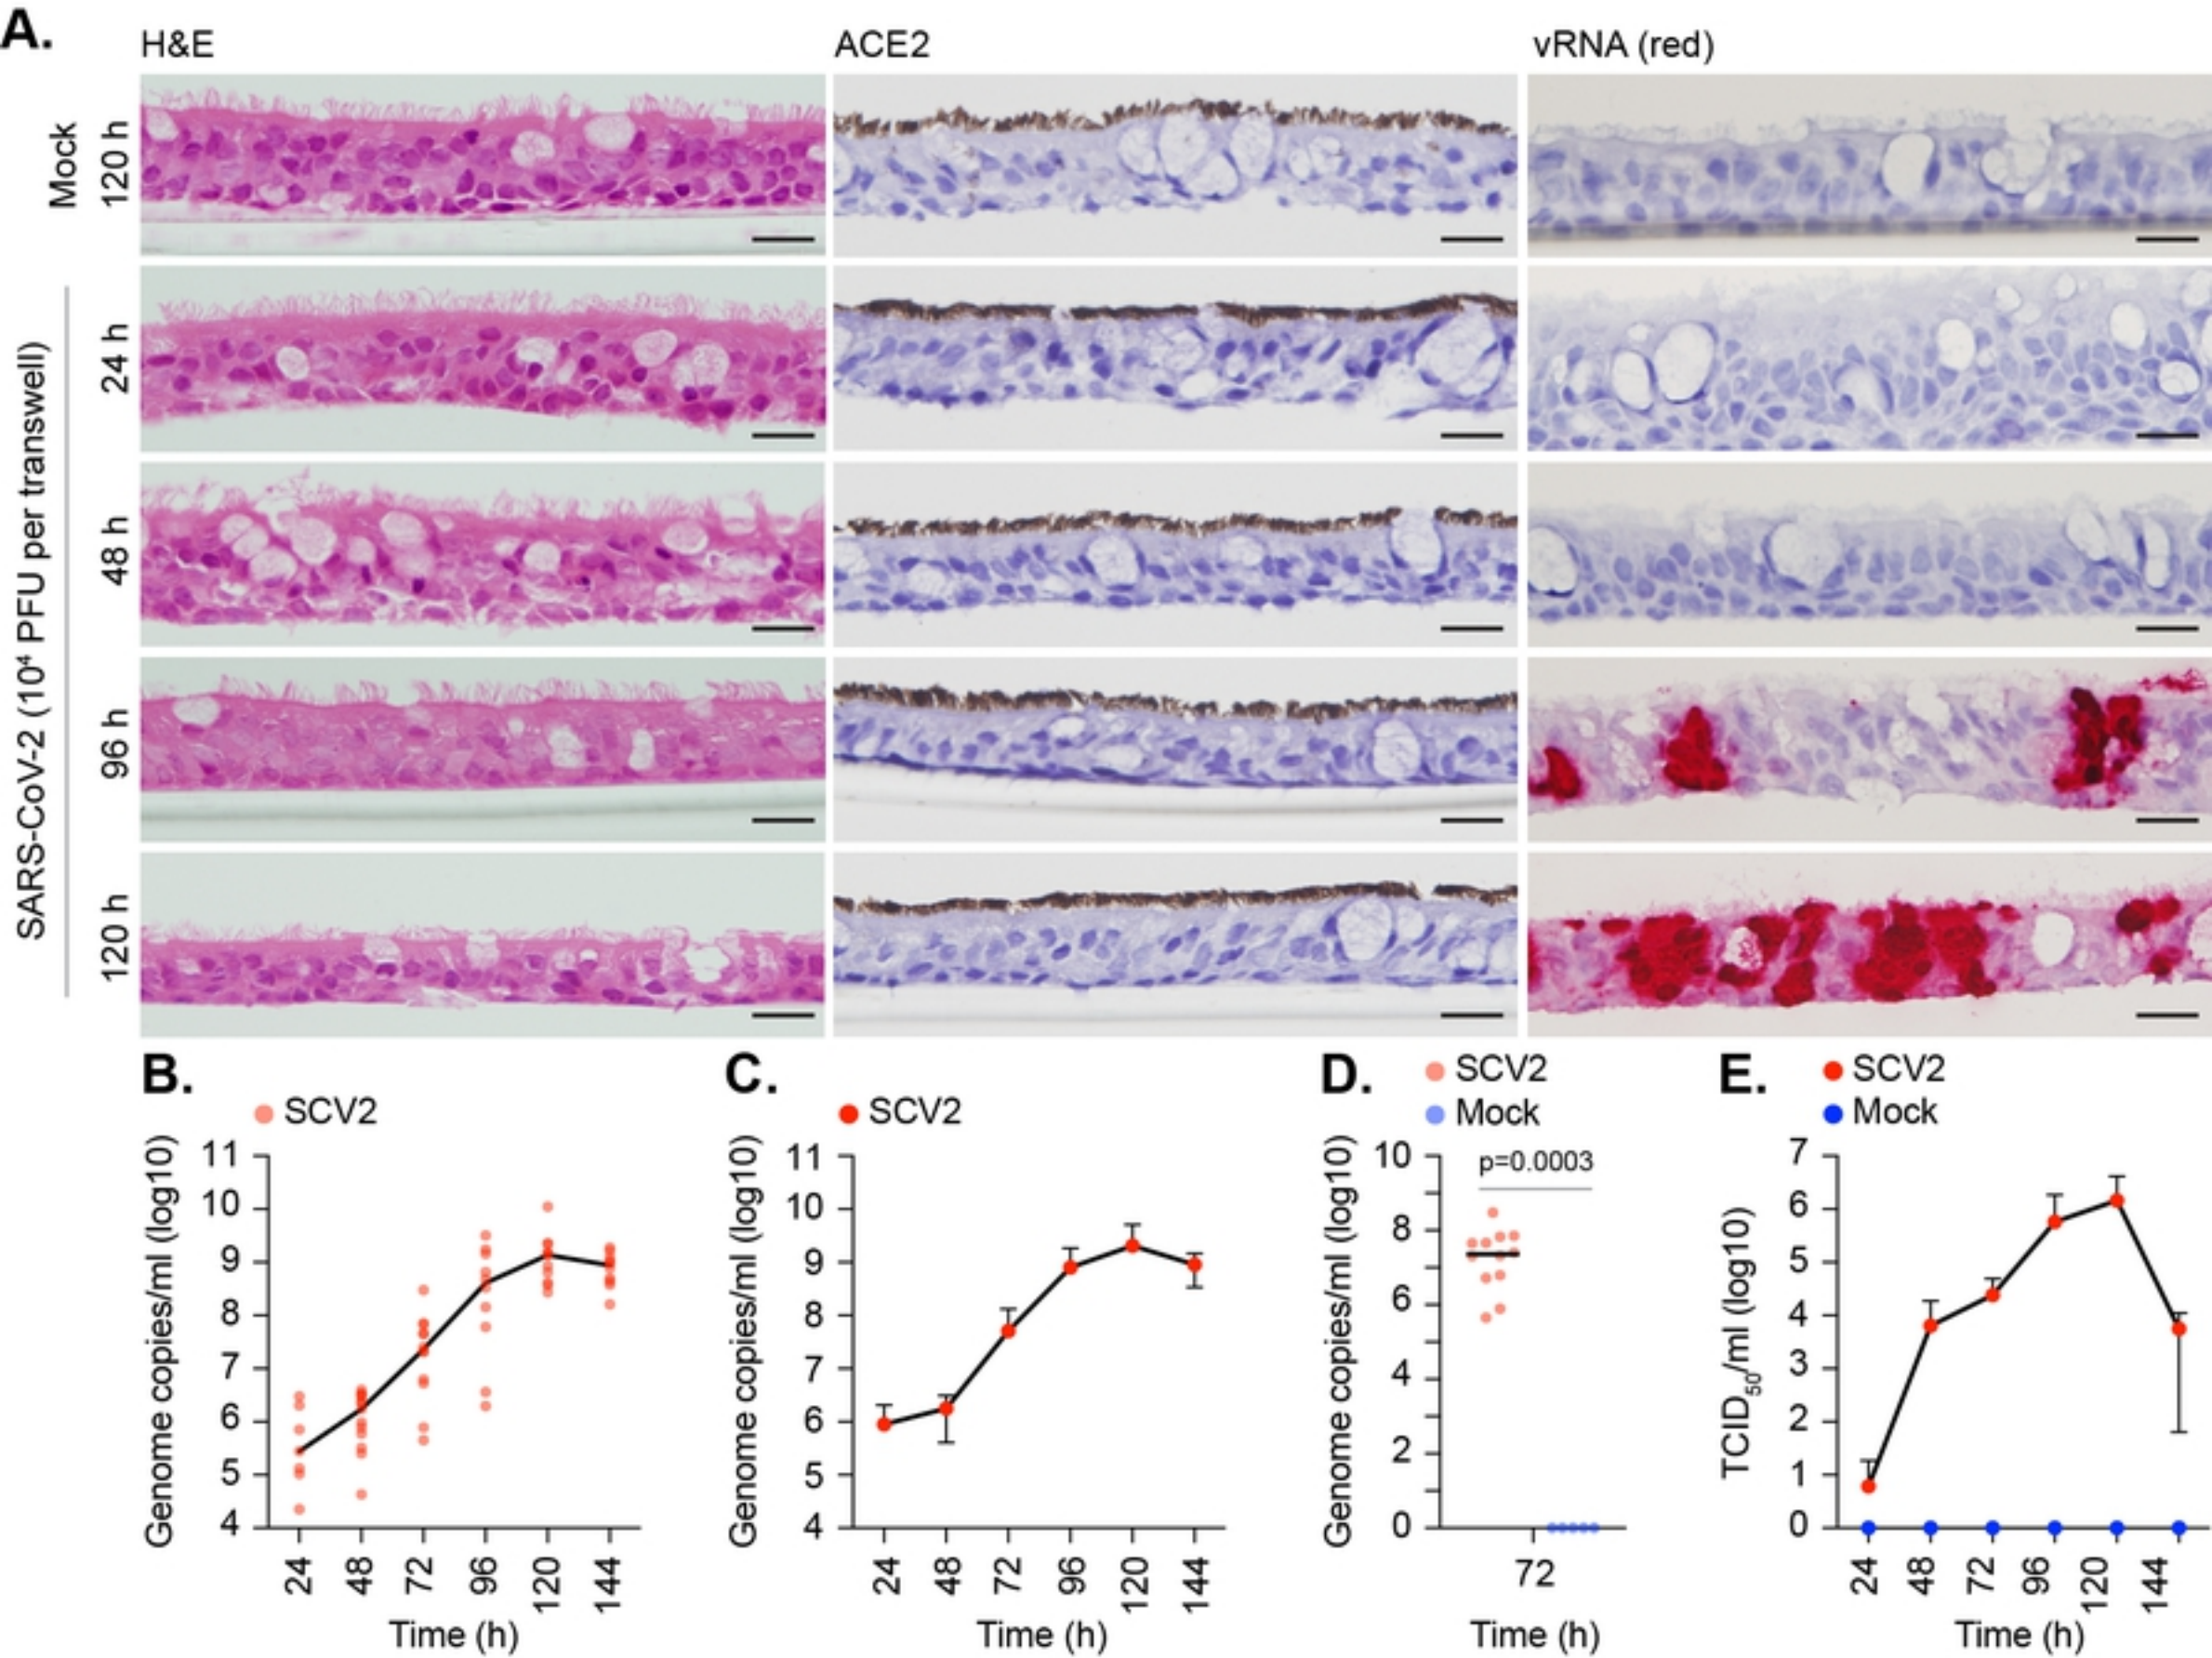

**Fig 1**

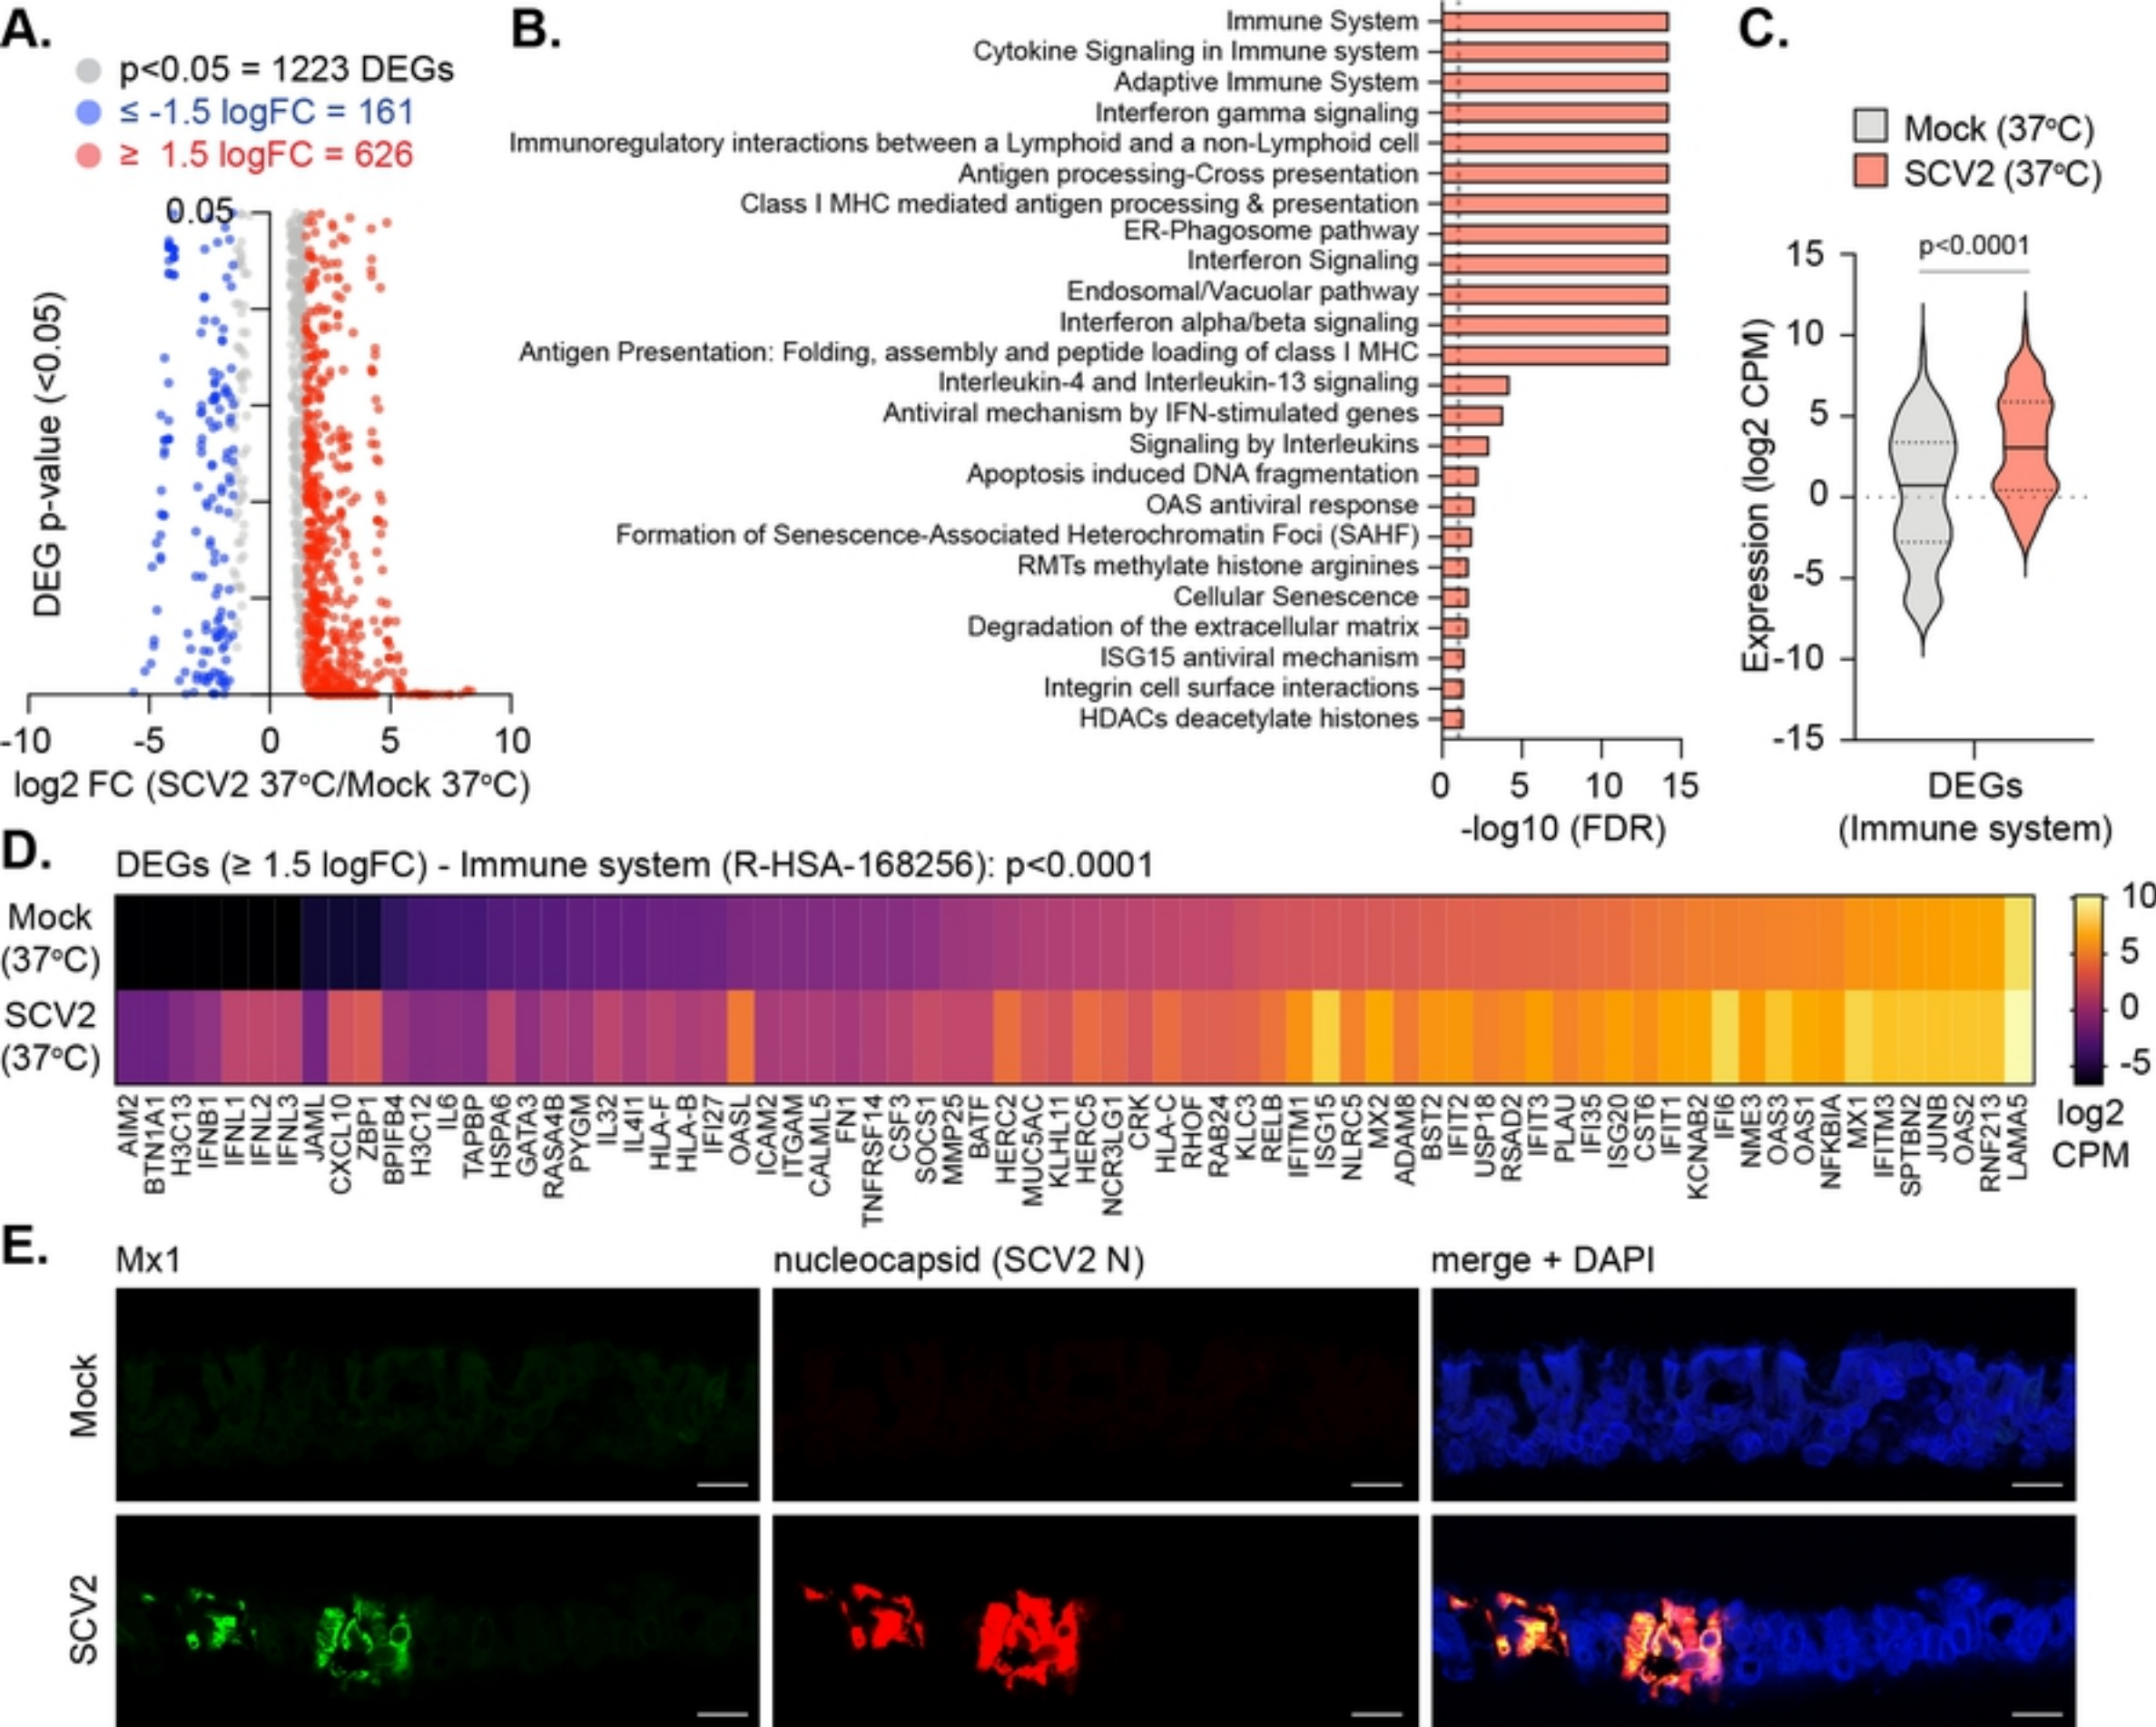

Fig 2

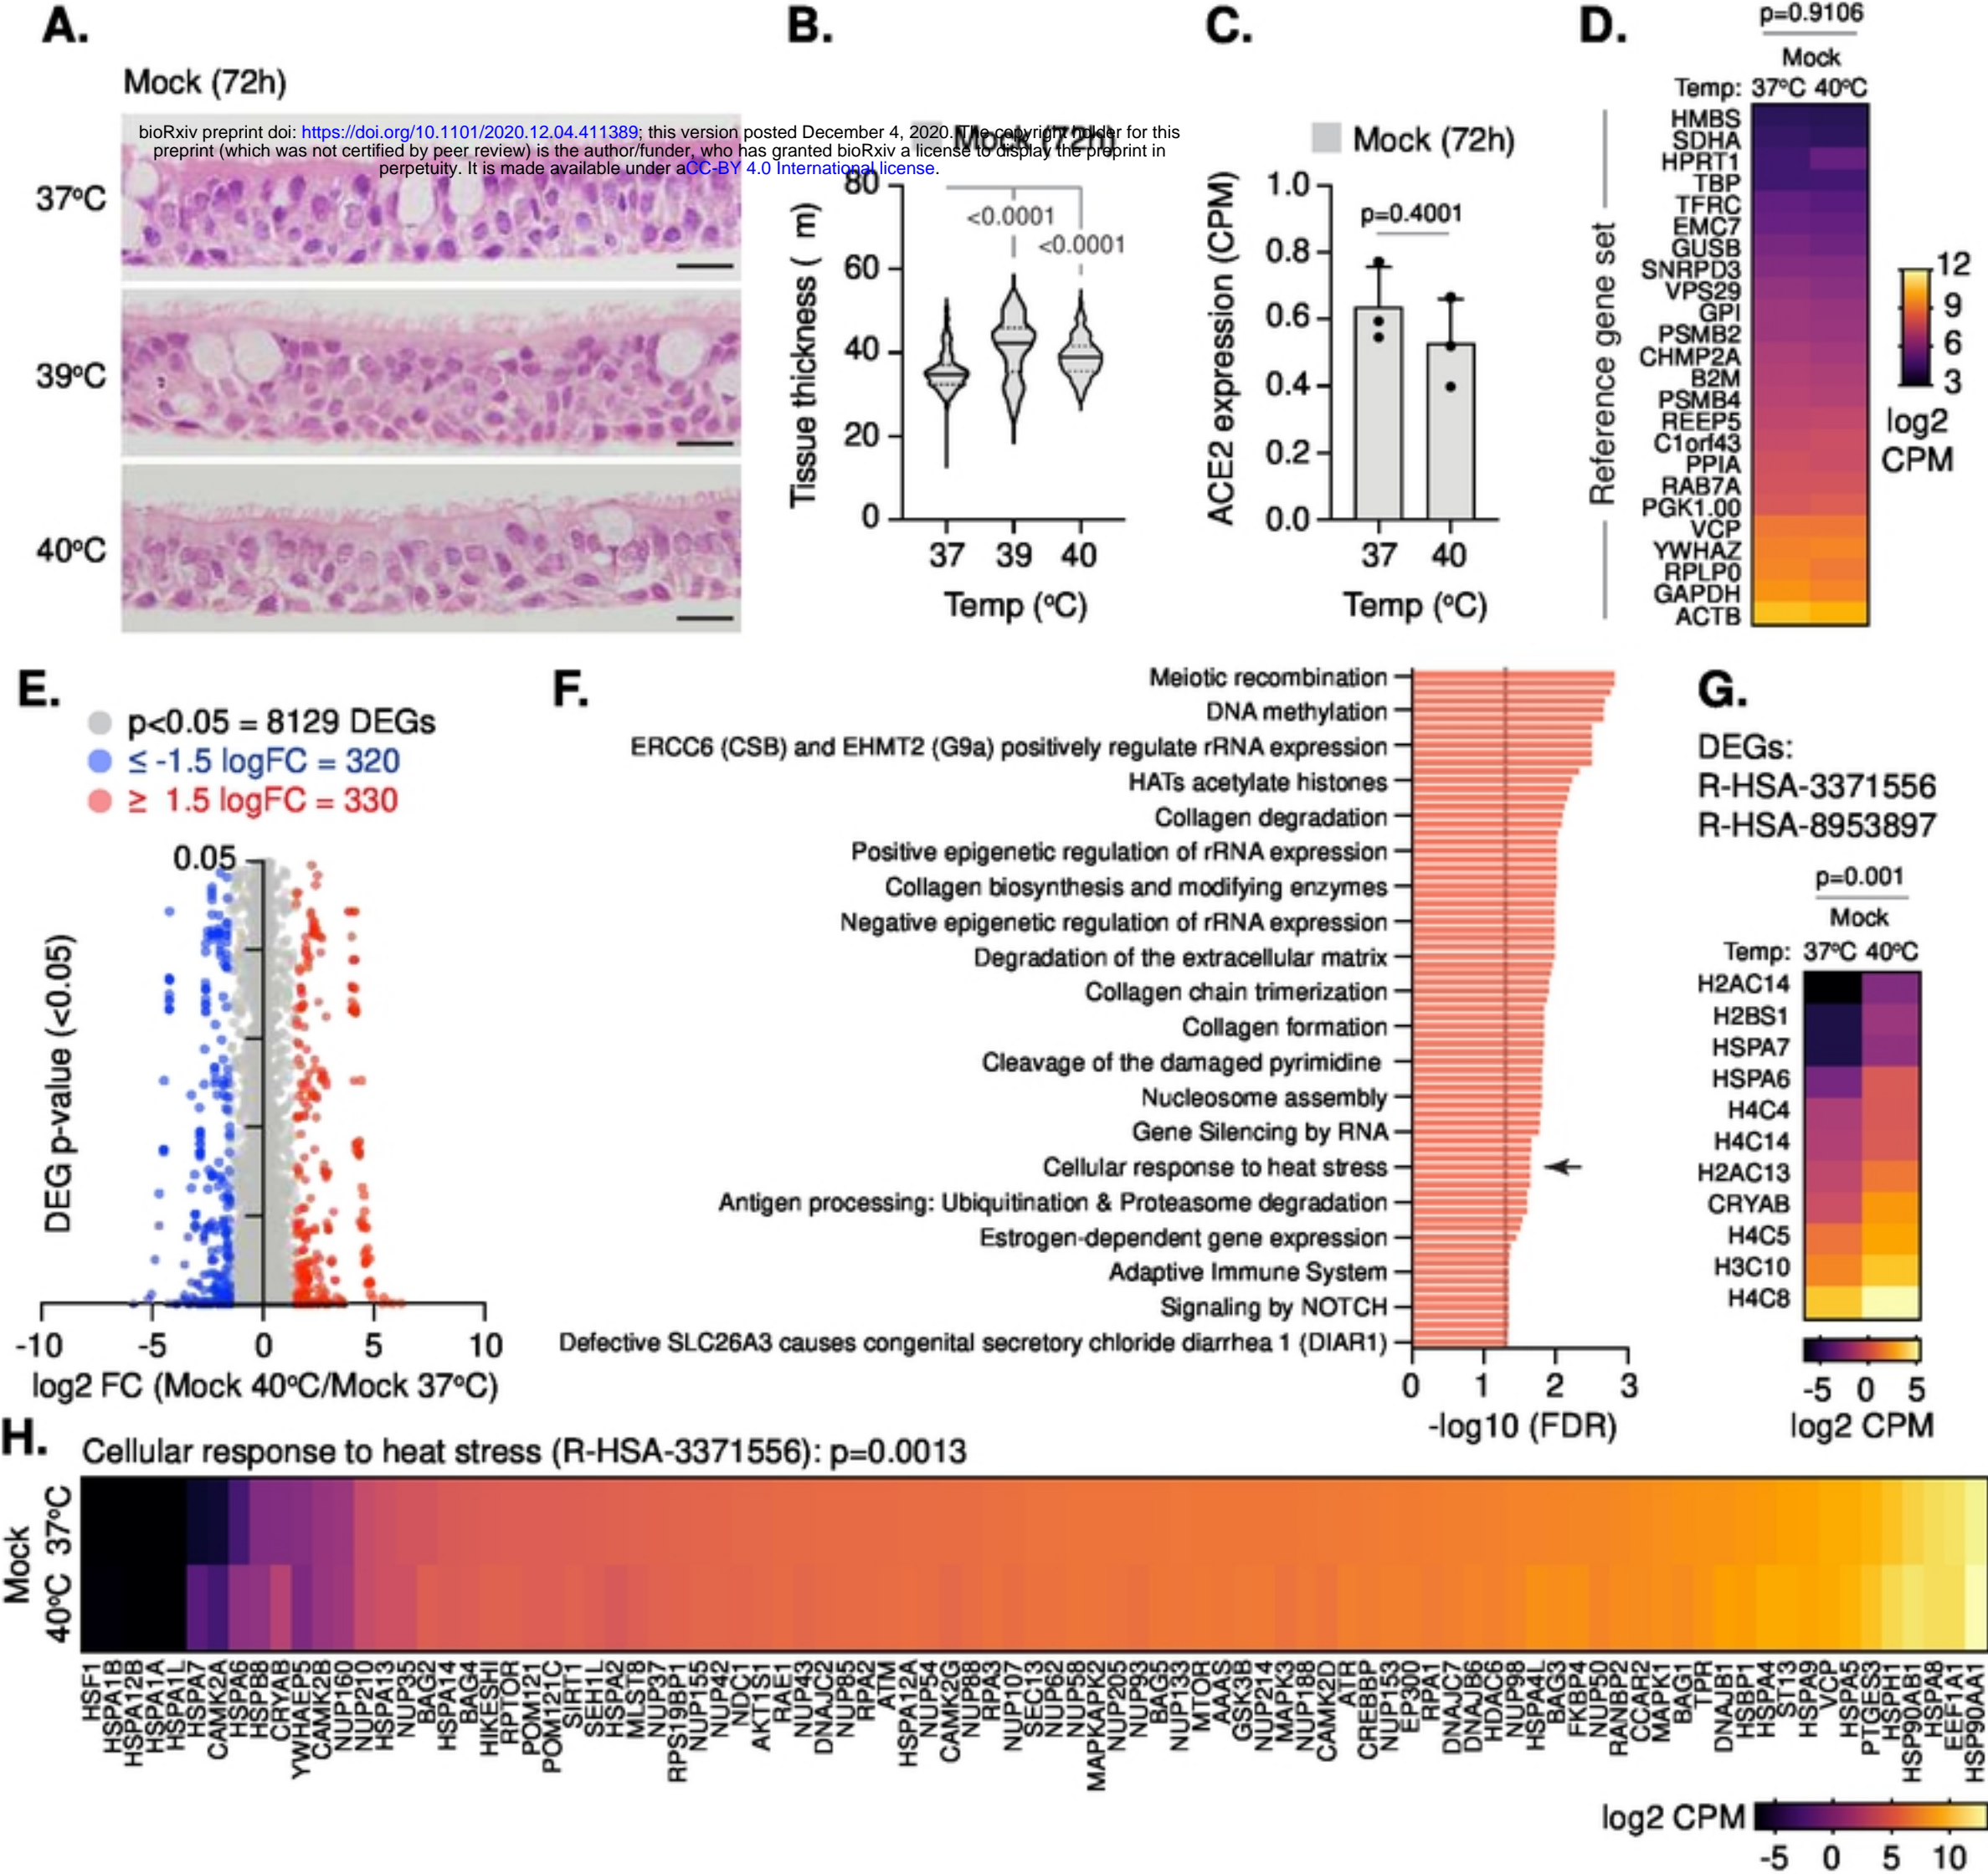

Fig 3

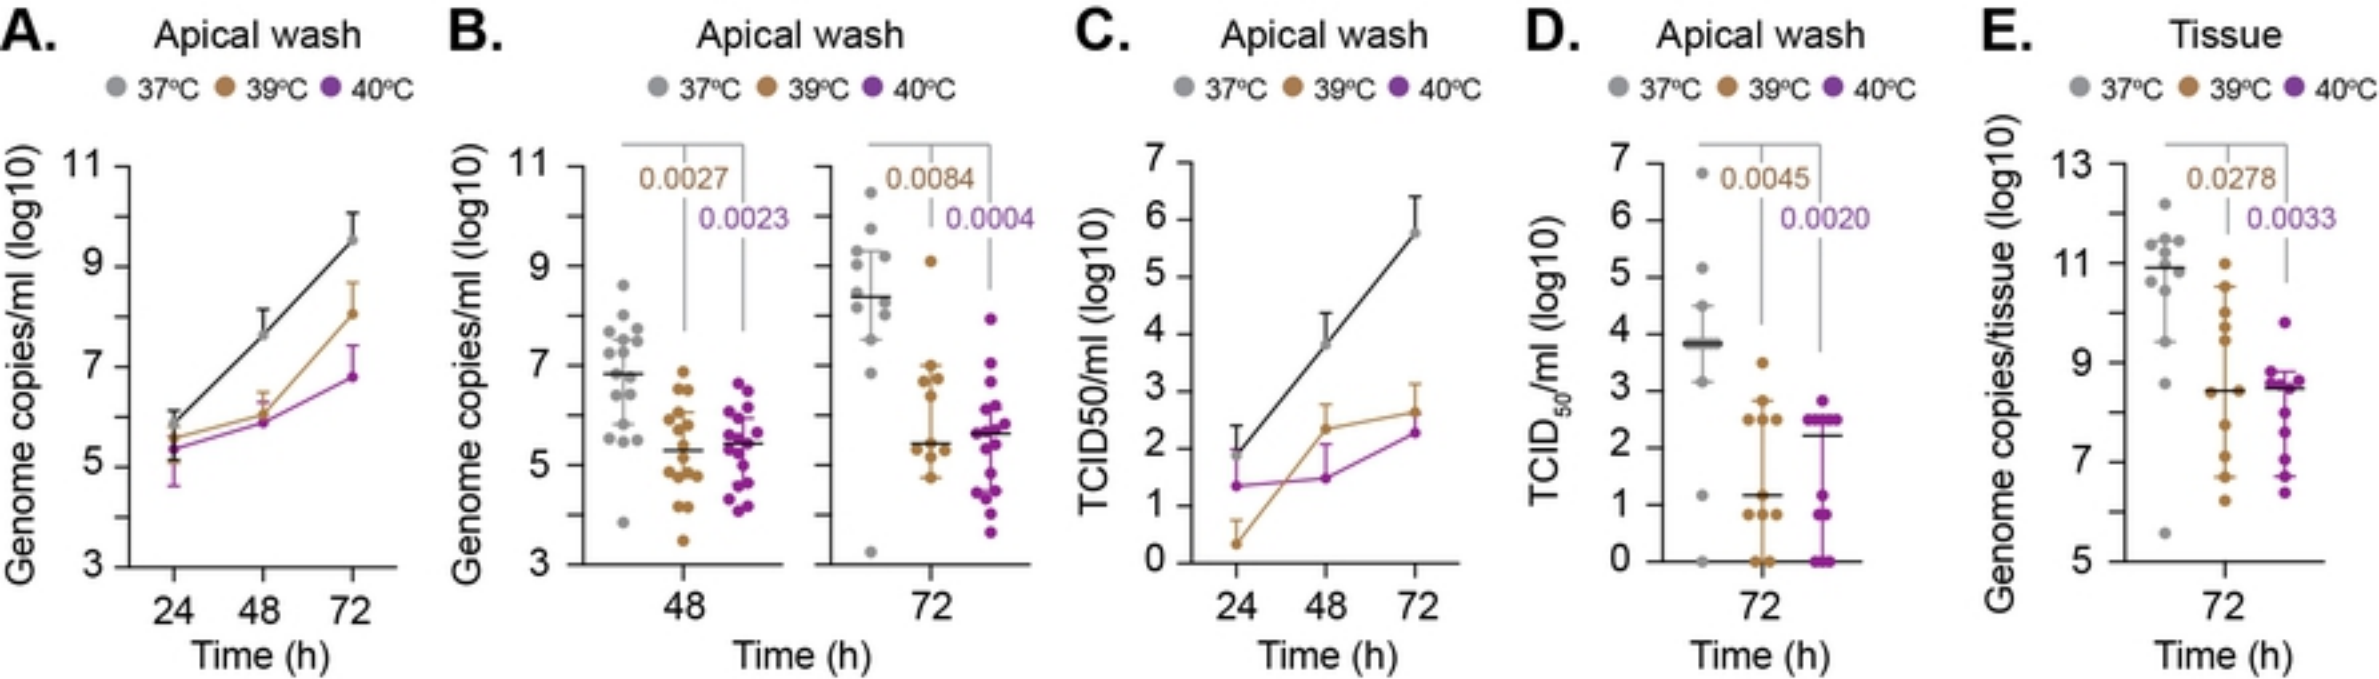

Manuscript

**A.**

● SCV40/Mock40    ● SCV37/Mock37  
● SCV40/Mock37    ● Mck40/Mock37

upregulated (FDR  $\geq 1.5 \log_2$  FC)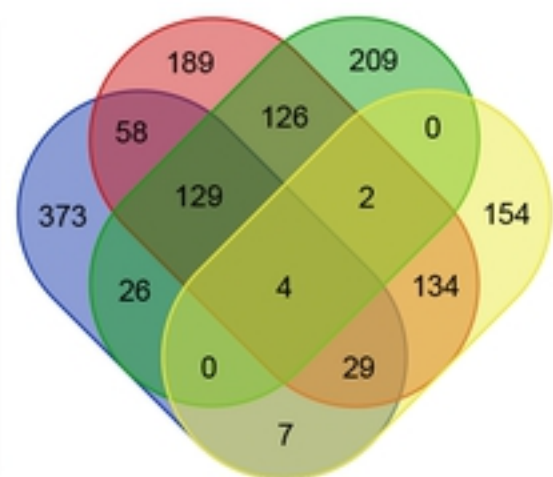downregulated (FDR  $\leq -1.5 \log_2$  FC)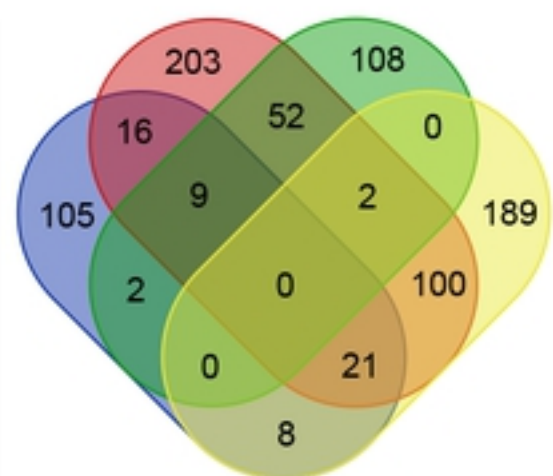**B.**

● Unique gene ID  
● Shared gene ID  
— Shared pathway ontology

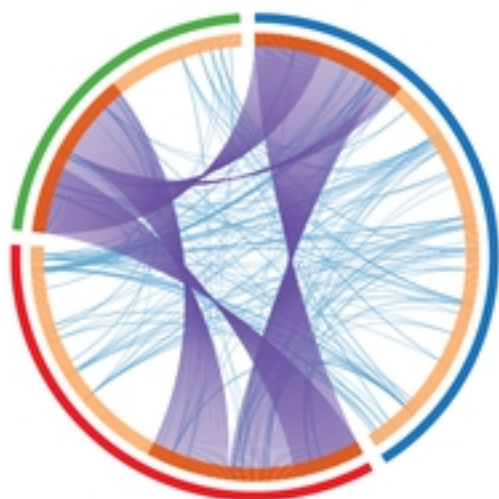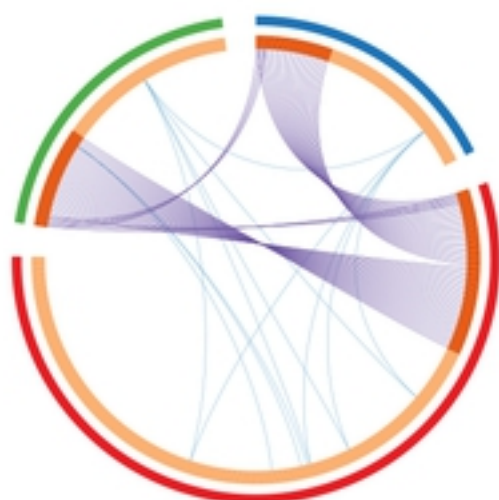**C.**

● SCV37/Mock37  
● SCV40/Mock37  
● SCV40/Mock40

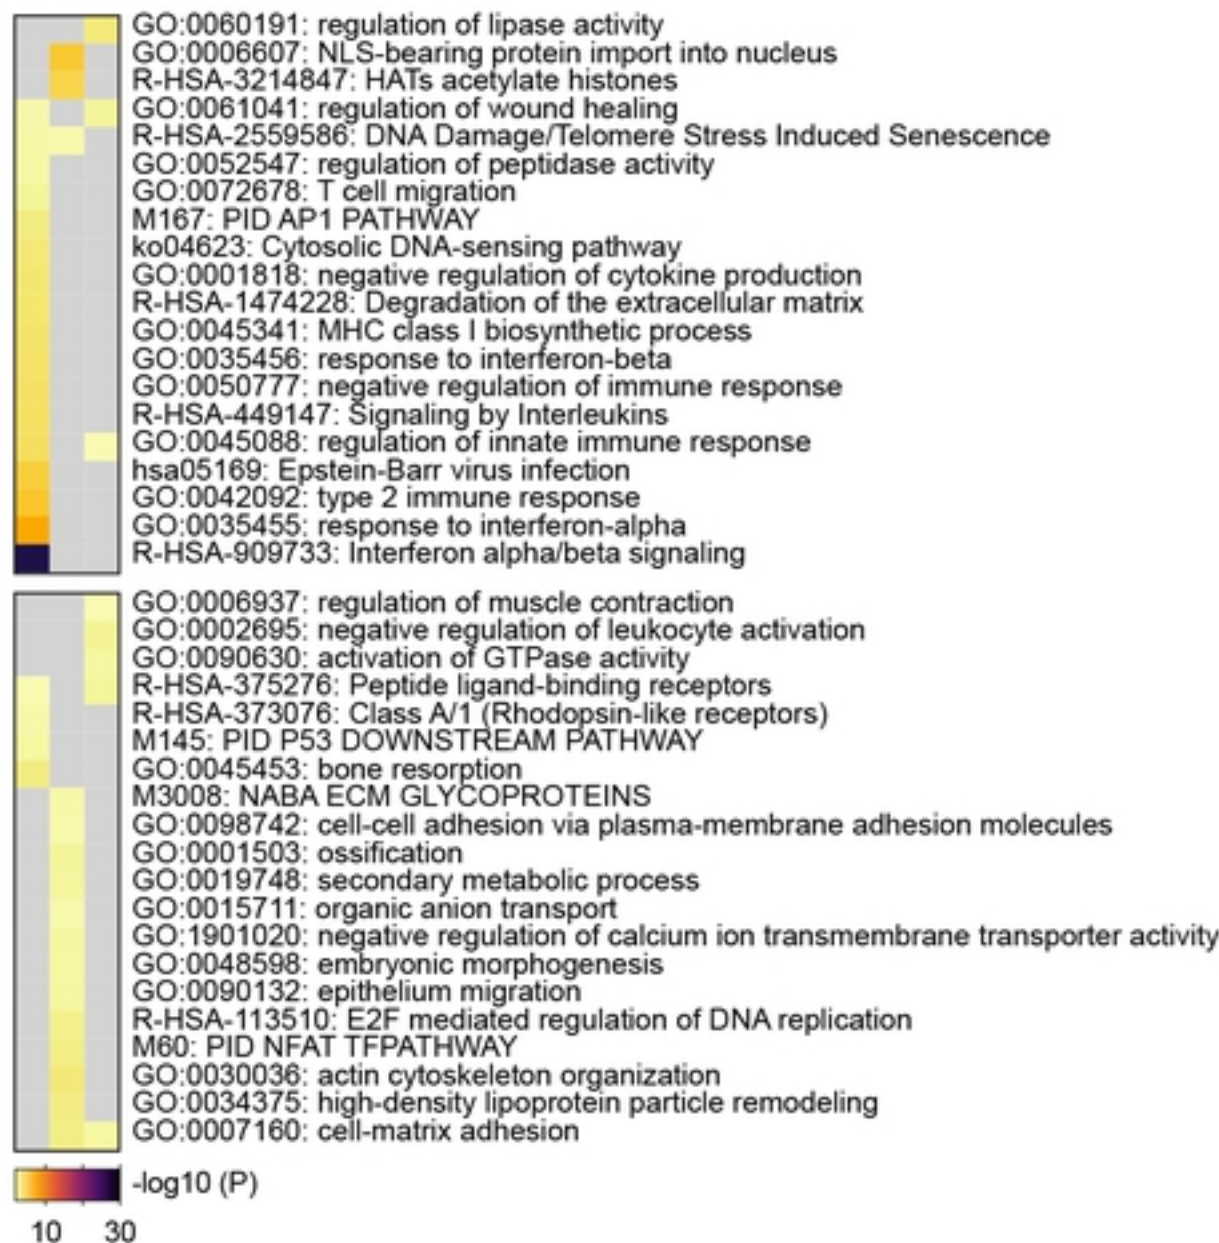**Fig 5**



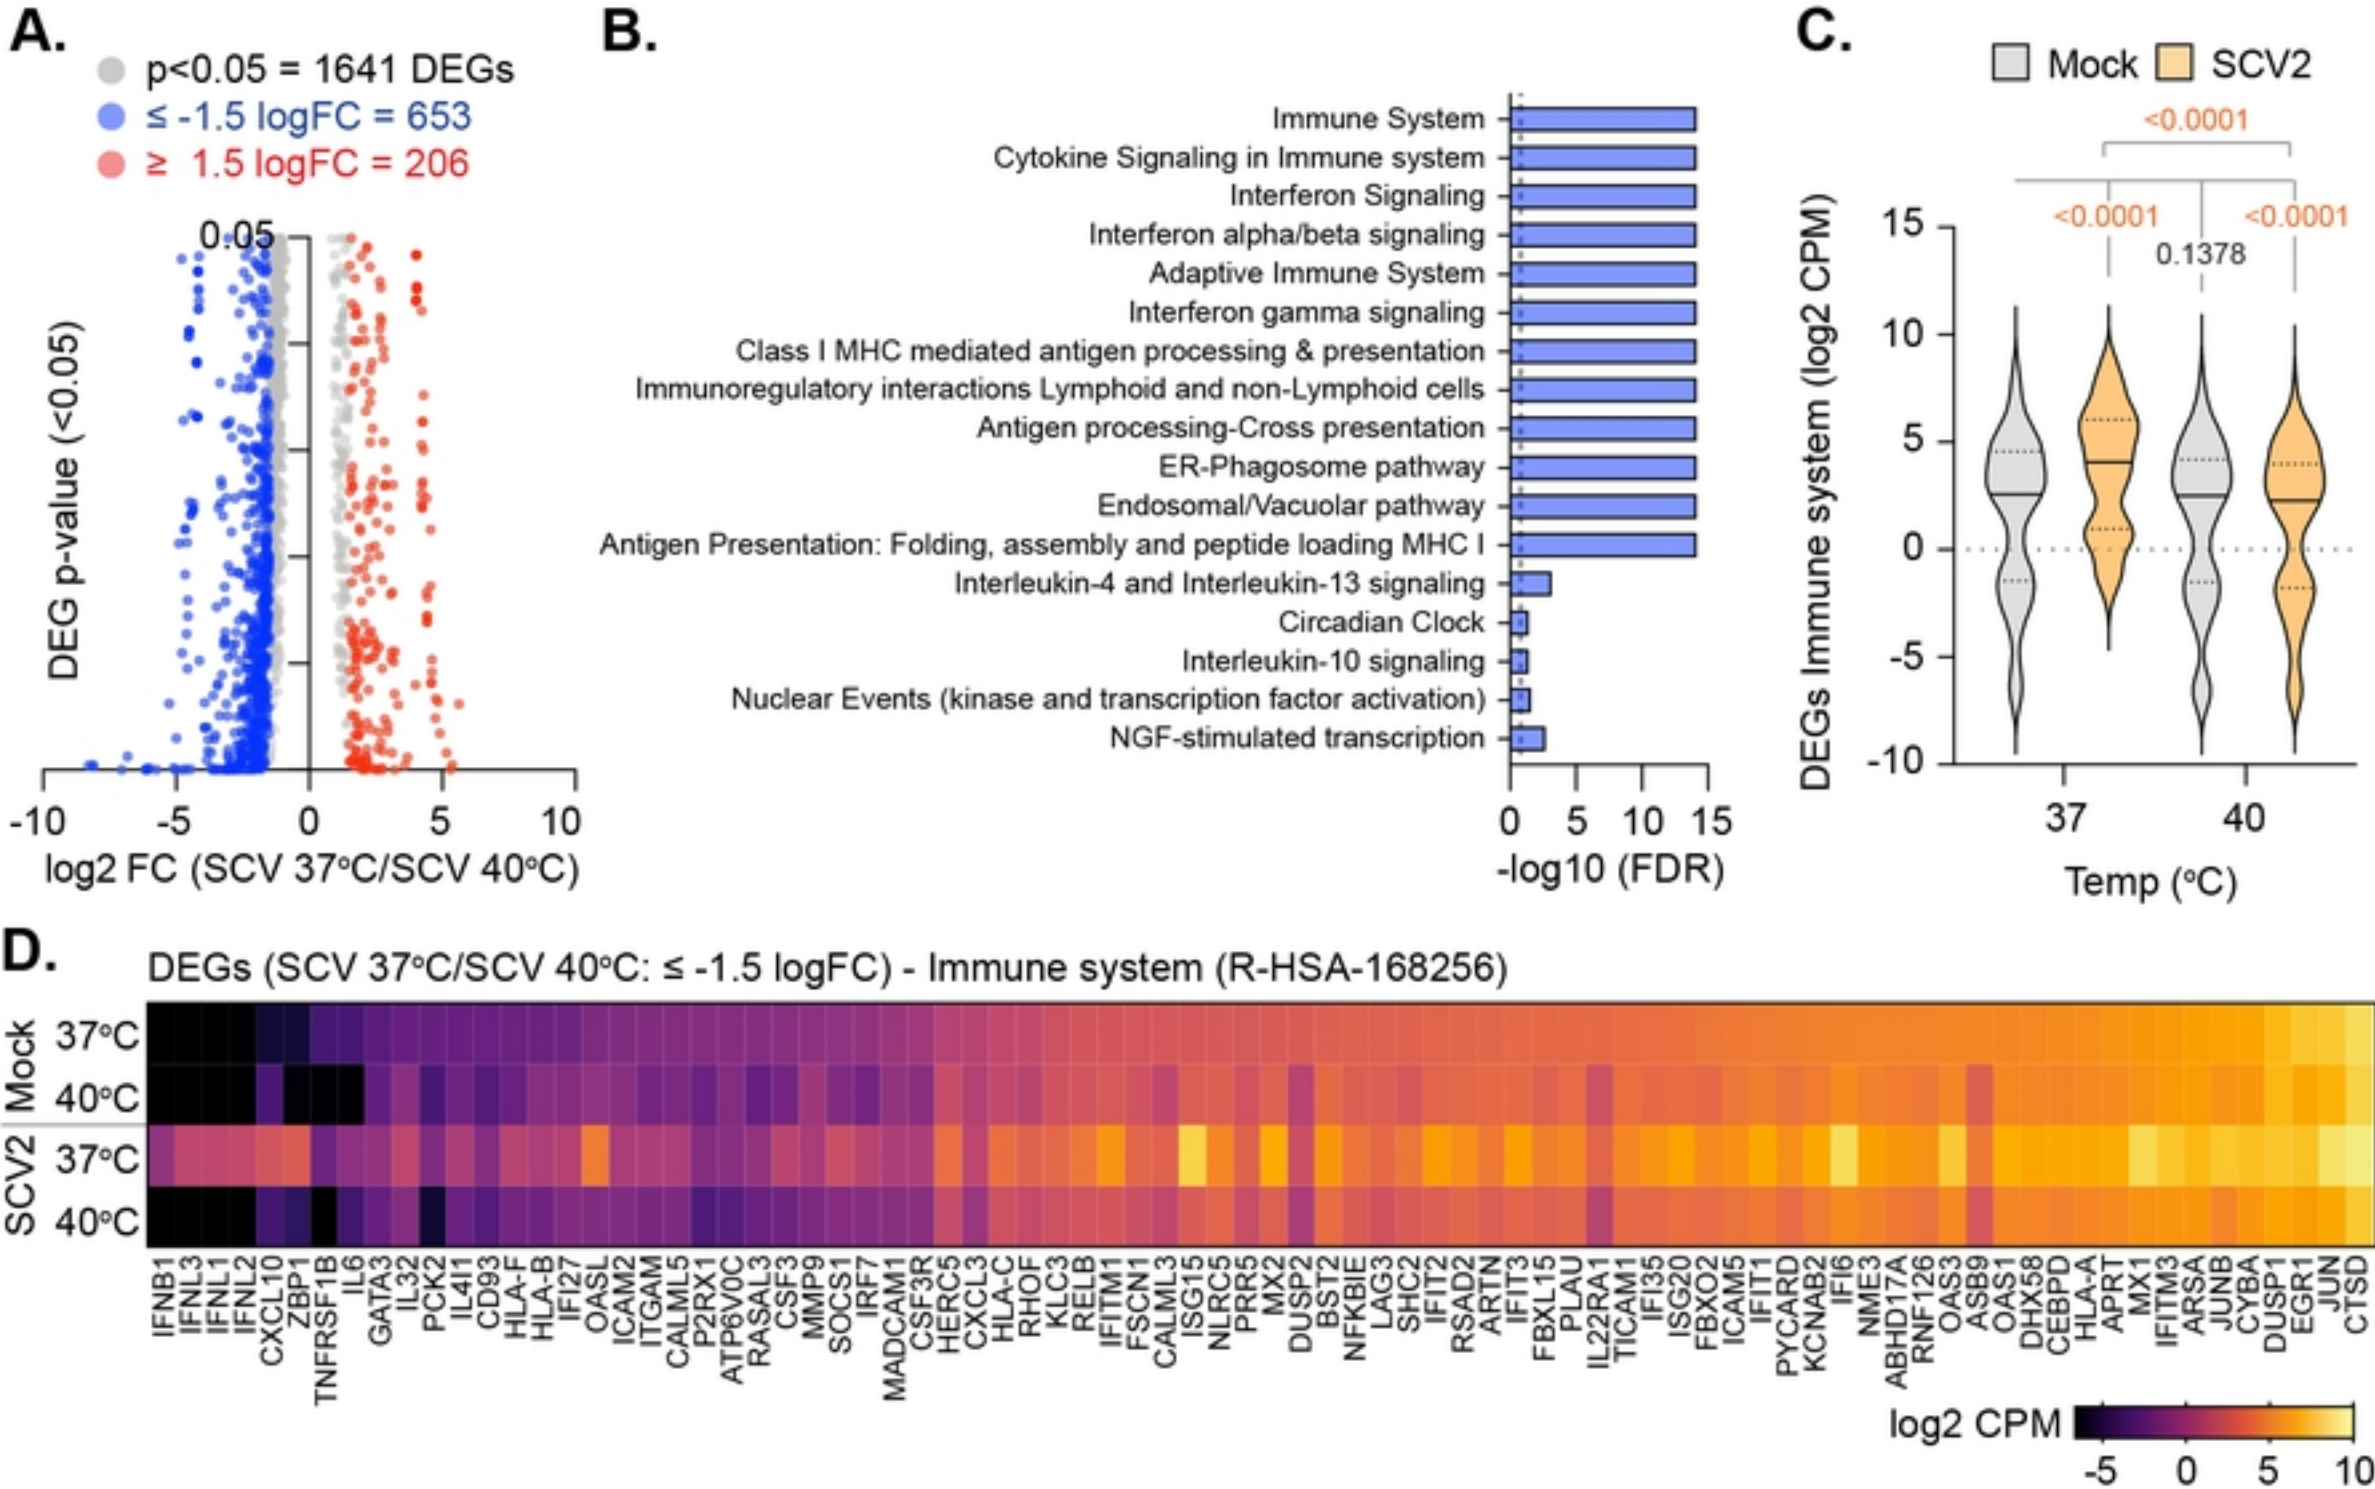

Fig 6

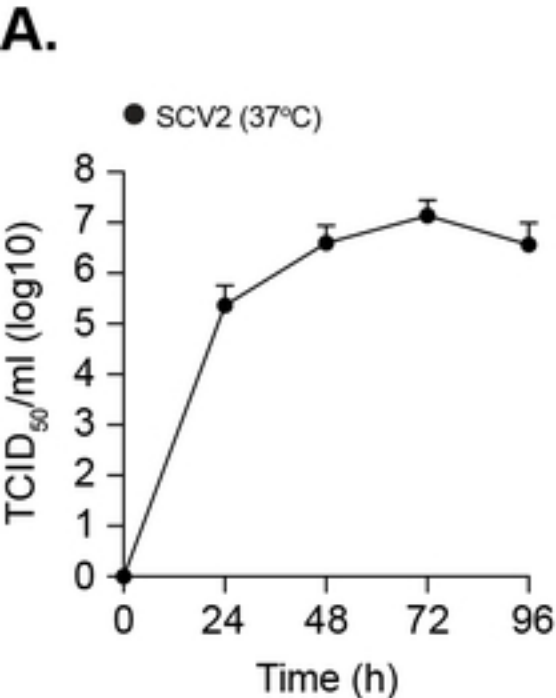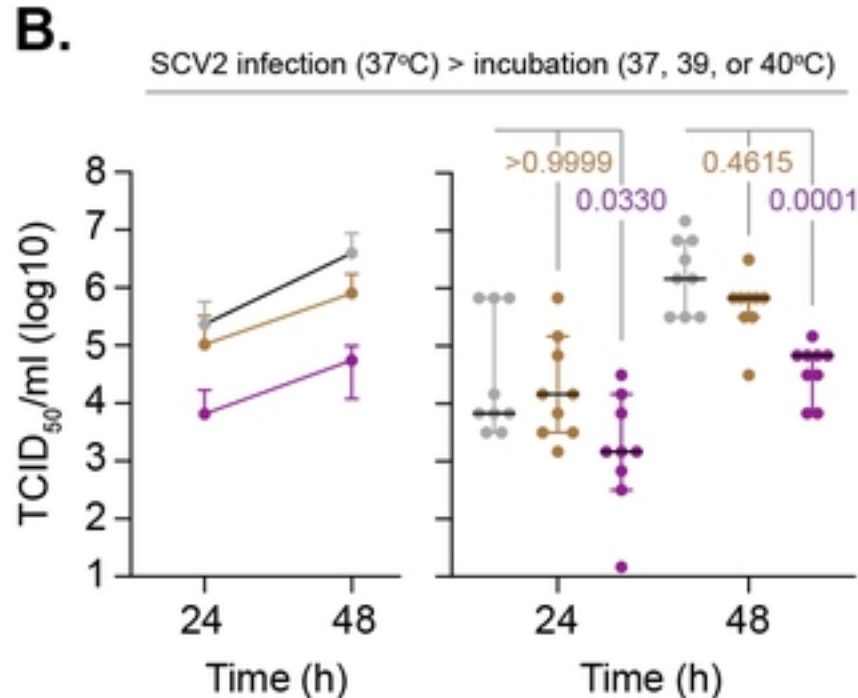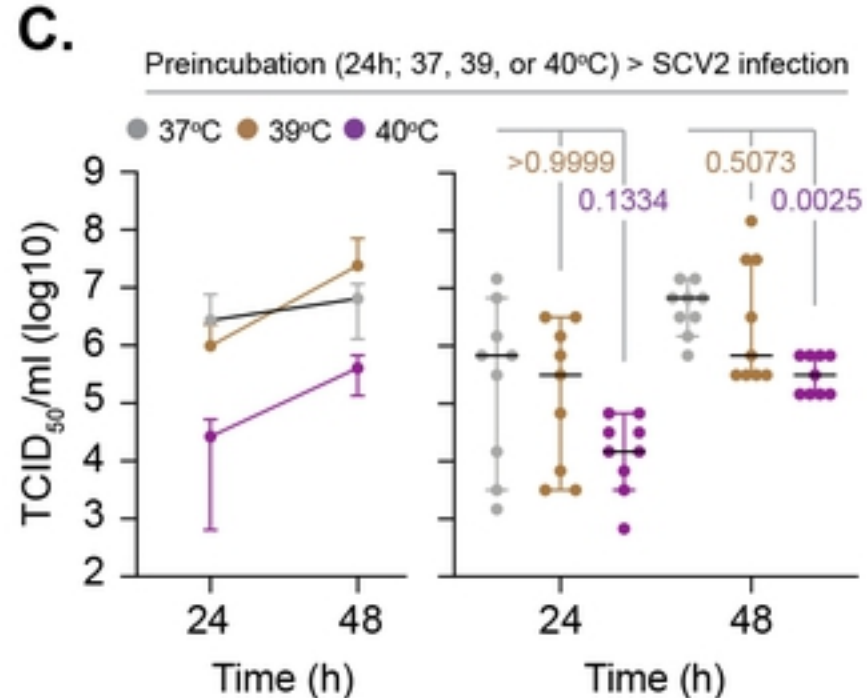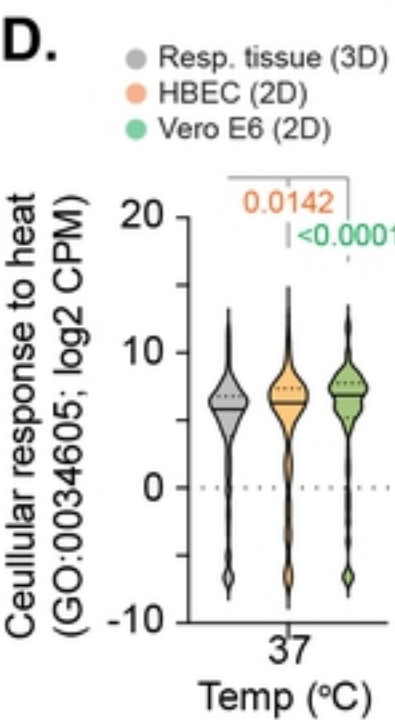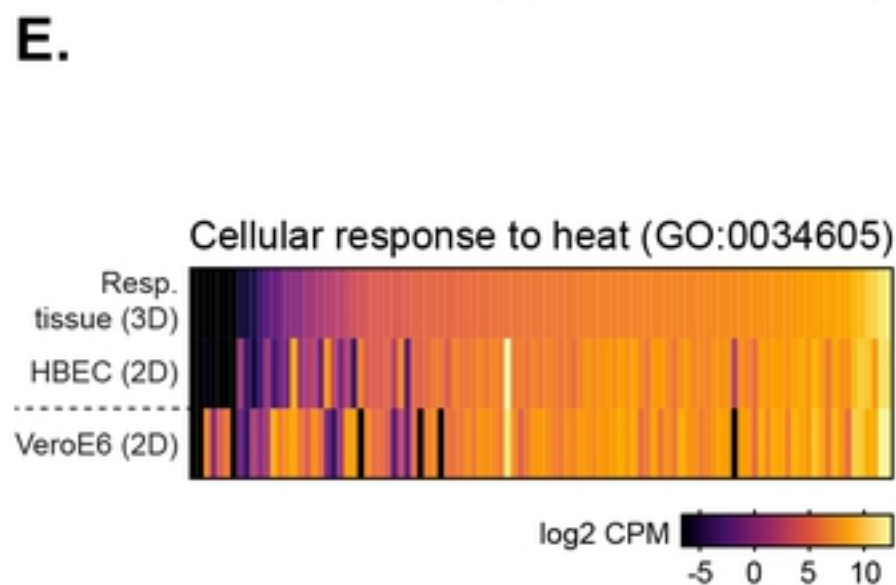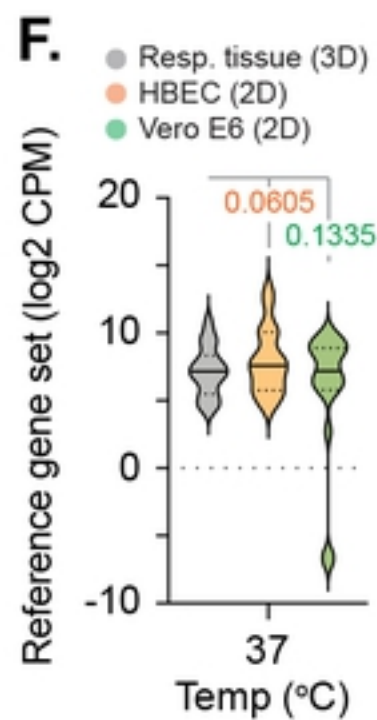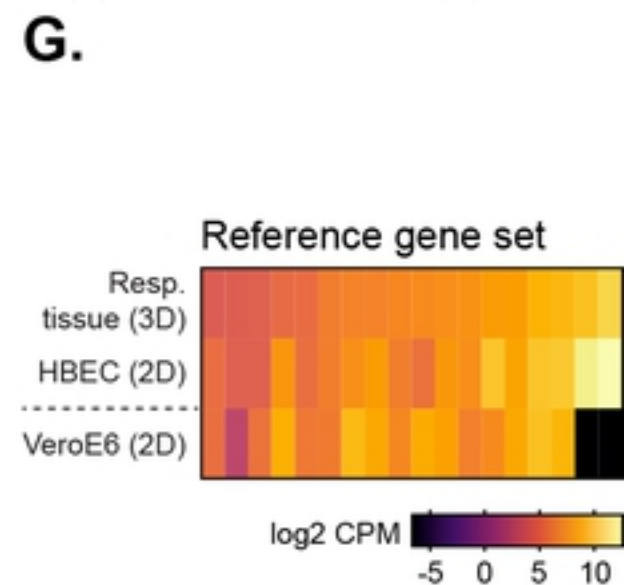

Fig 7

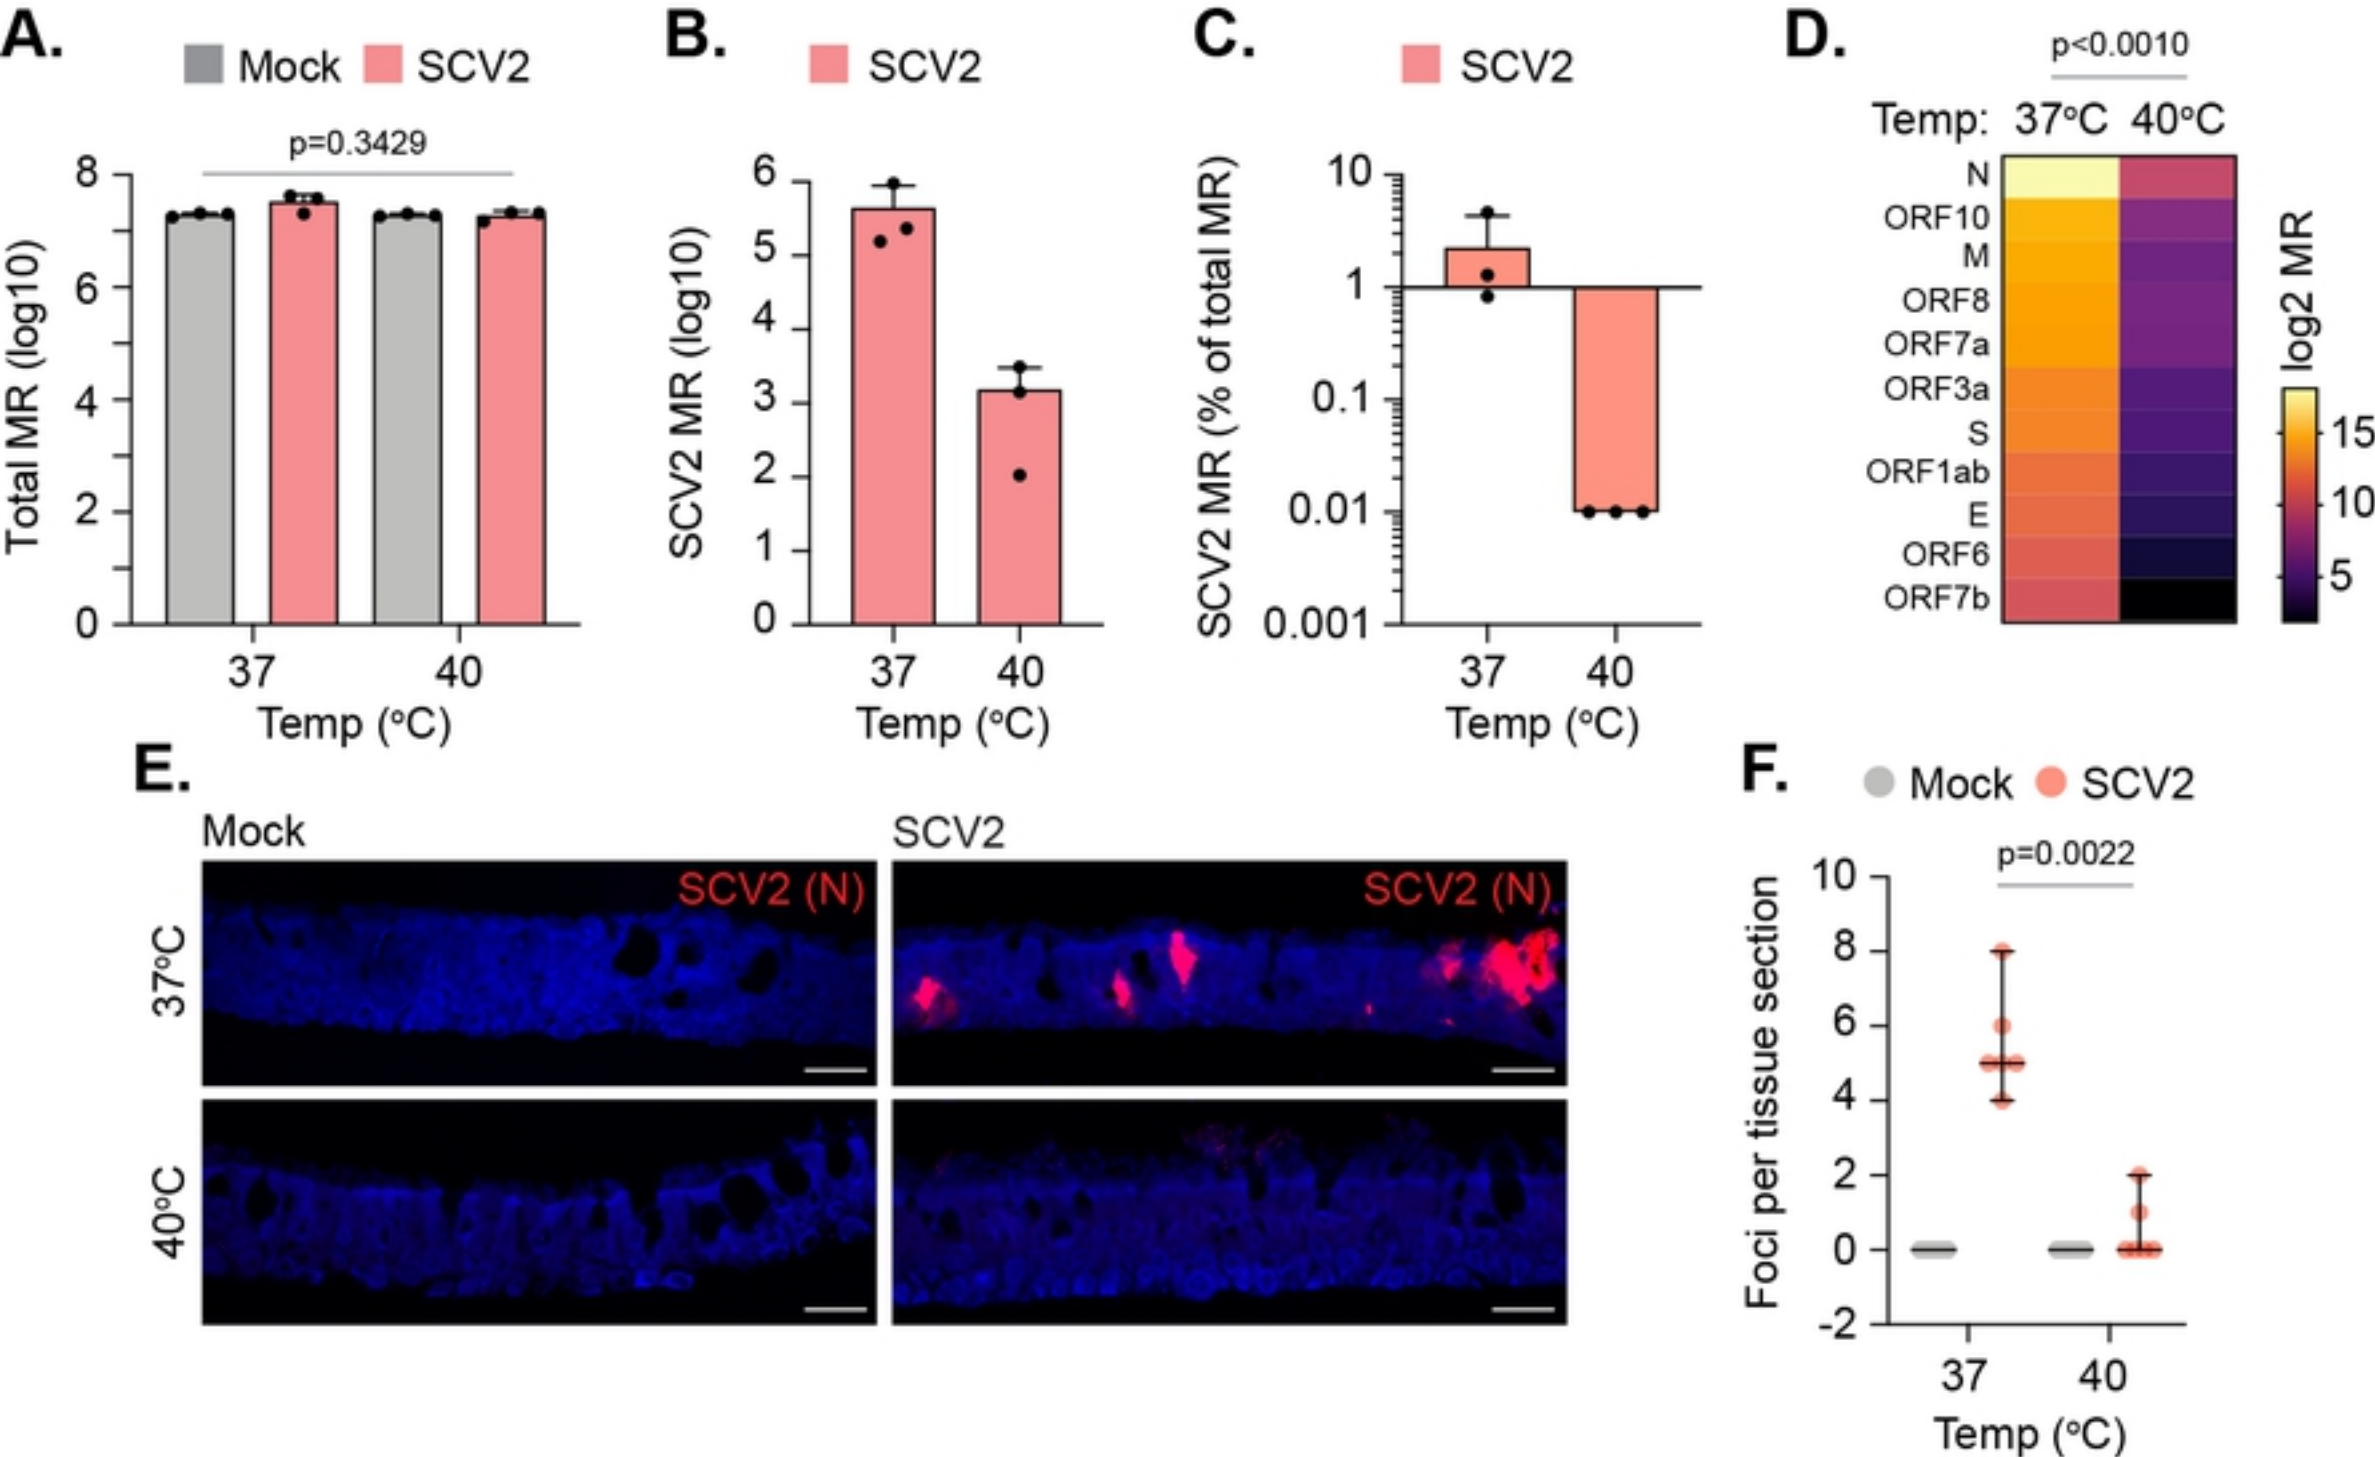

Fig 8
